# Supplementary material for: Interocular asymmetry of the superonasal retinal nerve fibre layer thickness and blood vessel diameter in healthy subjects
Source: PLoS One. 2019 Dec 23;14(12):e0226728. doi: 10.1371/journal.pone.0226728 (PMC6927597; doi:10.1371/journal.pone.0226728)
Supplement: S1 Dataset — (XLSX) [file pone.0226728.s001.xlsx]

## Sheet: Sheet1
ID	Eye	A/V	Measurement No. A	Location A (°)	Thickness A (µm)	Measurement No. B	Location B (°)	Thickness B (µm)	Measurement No. C	Location C (°)	Thickness C (µm)	Average Thickness (µm)	Approx. Vessel Diameter (µm)	Approx. Vessel Diameter (deg)	Sort Location	Sort BV Diameter
11571	R	A	56	26.25	81	59	27.6562	83	57.5	26.9531	81.5	81.8	42.9515	1.40625	1
18850	R	A	55	25.7812	56	58	27.1875	59	56.5	26.4844	57.5	57.5	42.9515	1.40625	1
27092739	R	A	55	25.7812	69	58	27.1875	68	56.5	26.4844	69	68.75	42.9515	1.40625	1
26972	R	A	48	22.5	76	54	25.3125	82	51	23.9062	80	79.4	85.9029	2.8125	1
2523	R	A	49	22.9688	99	53	24.8438	96	51	23.9062	98	97.6	57.2686	1.875	1
27099620	R	A	44	20.625	72	48	22.5	74	46	21.5625	73	73.2	57.2686	1.875	1
27099638	R	A	56	26.25	85	61	28.5938	83	58.5	27.4219	84	84	71.5858	2.34375	1
27885	R	A	41	19.2188	73	44	20.625	69	42.5	19.9219	72	71.5	42.9515	1.40625	1
27099242	R	A	62	29.0625	64	65	30.4688	65	63.5	29.7656	64.5	64.5	42.9515	1.40625	1
27098826	R	A	30	14.0625	63	34	15.9375	62	32	15	63	62.6	57.2686	1.875	1
2506	R	A	72	33.75	84	76	35.625	85	74	34.6875	84	84.4	57.2686	1.875	2
2506	R	V	110	51.5625	107	116	54.375	108	113	52.9688	109	108.4	85.9029	2.8125	2
27099358	R	A	91	42.6562	87	99	46.4062	90	95	44.5312	91	90	114.537	3.75	2
11571	R	V	114	53.4375	141	118	55.3125	150	116	54.375	145	145.2	57.2686	1.875	2
27092948	R	A	72	33.75	95	76	35.625	102	74	34.6875	99	99.125	57.2686	1.875	2
28280	R	A	103	48.2812	127	110	51.5625	136	106.5	49.9219	131.5	131.5	100.22	3.28125	2
27616	R	A	87	40.7812	96	92	43.125	100	89.5	41.9531	98.5	98.3	71.5858	2.34375	2
27095195	R	A	80	37.5	96	86	40.3125	103	83	38.9062	100	99.6	85.9029	2.8125	2
27100058	R	V	120	56.25	133	128	60	175	124	58.125	154	154	114.537	3.75	2
21215	R	A	67	31.4062	85	68	31.875	87	67.5	31.6406	86	86	14.3172	0.46875	2
27095054	R	A	117	54.8438	148	122	57.1875	162	119.5	56.0156	156.5	155.8	71.5858	2.34375	2
27099178	R	V	84	39.375	101	88	41.25	113	86	40.3125	108	107.4	57.2686	1.875	2
27092685	R	V	85	39.8438	87	89	41.7188	91	87	40.7812	89	89	57.2686	1.875	2
27097879	R	A	71	33.2812	75	74	34.6875	75	72.5	33.9844	74	74.5	42.9515	1.40625	2
27093905	R	A	117	54.8438	107	121	56.7188	119	119	55.7812	114	113.2	57.2686	1.875	2
12627	R	A	75	35.1562	83	80	37.5	83	77.5	36.3281	82	82.3	71.5858	2.34375	2
27095453	R	A	92	43.125	97	98	45.9375	96	95	44.5312	98	97.3	85.9029	2.8125	2
27092341	R	A	66	30.9375	89	73	34.2188	91	69.5	32.5781	91	90.5	100.22	3.28125	2
27092341	R	V	124	58.125	128	130	60.9375	138	127	59.5312	134	133.3	85.9029	2.8125	2
27098959	R	A	105	49.2188	166	113	52.9688	167	109	51.0938	176	171.9	114.537	3.75	2
2523	R	A	87	40.7812	115	91	42.6562	117	89	41.7188	116	116	57.2686	1.875	2
27095138	R	A	83	38.9062	81	90	42.1875	88	86.5	40.5469	84	84.1	100.22	3.28125	2
27099362	R	A	75	35.1562	95	80	37.5	99	77.5	36.3281	98.5	97.8	71.5858	2.34375	2
27099362	R	V	125	58.5938	107	130	60.9375	103	127.5	59.7656	105	105	71.5858	2.34375	2
28170	R	V	73	34.2188	109	77	36.0938	114	75	35.1562	112	111.6	57.2686	1.875	2
27099339	R	A	65	30.4688	101	71	33.2812	102	68	31.875	102	101.7	85.9029	2.8125	2
27099530	R	V	73	34.2188	63	78	36.5625	66	75.5	35.3906	65.5	65	71.5858	2.34375	2
27099412	R	A	66	30.9375	84	72	33.75	86	69	32.3438	85	84.9	85.9029	2.8125	2
27099662	R	A	77	36.0938	92	83	38.9062	95	80	37.5	94	93.7	85.9029	2.8125	2
27093728	R	A	95	44.5312	108	102	47.8125	100	98.5	46.1719	104	104	100.22	3.28125	2
27099470	R	A	83	38.9062	89	86	40.3125	73	84.5	39.6094	71.5	71.3	42.9515	1.40625	2
27099572	R	A	82	38.4375	88	86	40.3125	87	84	39.375	88	87.6	57.2686	1.875	2
27099242	R	A	84	39.375	89	90	42.1875	93	87	40.7812	92	91.6	85.9029	2.8125	2
27099242	R	V	121	56.7188	111	125	58.5938	117	123	57.6562	115	114.4	57.2686	1.875	2
27099670	R	A	108	50.625	94	112	52.5	101	110	51.5625	97	97.4	57.2686	1.875	2
27098121	R	V	81	37.9688	86	90	42.1875	88	85.5	40.0781	86	86.3	128.854	4.21875	2
27094309	R	V	120	56.25	161	129	60.4688	173	124.5	58.3594	168.5	168.1	128.854	4.21875	2
27099159	R	V	90	42.1875	118	95	44.5312	123	92.5	43.3594	121.5	121.2	71.5858	2.34375	2
17692	R	V	79	37.0312	94	84	39.375	95	81.5	38.2031	98	96.5	71.5858	2.34375	2
17692	R	V	108	50.625	91	113	52.9688	96	110.5	51.7969	94.5	94.2	71.5858	2.34375	2
27092116	R	A	143	67.0312	138	146	68.4375	135	144.5	67.7344	136.5	136.5	42.9515	1.40625	3	0
27092116	R	A	180	84.375	124	189	88.5938	126	184.5	86.4844	125	125	128.854	4.21875	3	1
28242	R	V	158	74.0625	164	164	76.875	174	161	75.4688	169	169.1	85.9029	2.8125	3	0
28242	R	A	179	83.9062	178	186	87.1875	166	182.5	85.5469	172	171.9	100.22	3.28125	3	1
27093474	R	A	165	77.3438	142	170	79.6875	143	167.5	78.5156	143	142.7	71.5858	2.34375	3
27096056	R	A	171	80.1562	177	182	85.3125	202	176.5	82.7344	192	190.8	157.489	5.15625	3
2506	R	A	135	63.2812	116	142	66.5625	124	138.5	64.9219	120.5	120.1	100.22	3.28125	3
2506	R	V	181	84.8438	123	190	89.0625	103	185.5	86.9531	116.5	114.7	128.854	4.21875	3
27099358	R	A	152	71.25	105	158	74.0625	109	155	72.6562	107	107.1	85.9029	2.8125	3
2223	R	A	147	68.9062	243	157	73.5938	234	152	71.25	241	240.2	143.172	4.6875	3
2223	R	V	162	75.9375	223	170	79.6875	195	166	77.8125	211	210	114.537	3.75	3
27099587	R	V	162	75.9375	203	170	79.6875	195	166	77.8125	199	199	114.537	3.75	3
27099587	R	A	170	79.6875	195	178	83.4375	184	174	81.5625	190	189.7	114.537	3.75	3
11571	R	A	142	66.5625	165	151	70.7812	167	146.5	68.6719	169.5	168	128.854	4.21875	3
11571	R	V	187	87.6562	127	195	91.4062	113	191	89.5312	126	123.2	114.537	3.75	3
27092948	R	A	162	75.9375	156	167	78.2812	167	164.5	77.1094	163	162.2	71.5858	2.34375	3
27092948	R	V	182	85.3125	158	189	88.5938	146	185.5	86.9531	152.5	152.4	100.22	3.28125	3
28280	R	V	132	61.875	157	141	66.0938	170	136.5	63.9844	165	164.6	128.854	4.21875	3
28280	R	A	165	77.3438	113	173	81.0938	144	169	79.2188	121	123.9	114.537	3.75	3
28280	R	V	181	84.8438	175	188	88.125	154	184.5	86.4844	170.5	167.8	100.22	3.28125	3
27616	R	A	166	77.8125	150	170	79.6875	144	168	78.75	147	147.2	57.2686	1.875	3
27616	R	V	173	81.0938	141	183	85.7812	124	178	83.4375	136	134.4	143.172	4.6875	3
27097837	R	V	134	62.8125	149	143	67.0312	163	138.5	64.9219	158	157.2	128.854	4.21875	3
27097837	R	A	149	69.8438	173	158	74.0625	168	153.5	71.9531	176	173.7	128.854	4.21875	3
27100124	R	A	148	69.375	153	153	71.7188	163	150.5	70.5469	158	158	71.5858	2.34375	3
27100124	R	A	178	83.4375	187	190	89.0625	180	184	86.25	190	187.7	171.806	5.625	3
27100114	R	V	132	61.875	172	139	65.1562	188	135.5	63.5156	182	181.3	100.22	3.28125	3
27100114	R	V	170	79.6875	137	178	83.4375	169	174	81.5625	155	154.2	114.537	3.75	3
27100114	R	A	182	85.3125	178	189	88.5938	174	185.5	86.9531	180.5	178.8	100.22	3.28125	3
18850	R	A	172	80.625	137	179	83.9062	141	175.5	82.2656	138	138.5	100.22	3.28125	3
18850	R	V	184	86.25	146	195	91.4062	132	189.5	88.8281	147.5	144	157.489	5.15625	3
27100224	R	V	125	58.5938	151	132	61.875	150	128.5	60.2344	151	150.8	100.22	3.28125	3
27100224	R	A	152	71.25	125	159	74.5312	123	155.5	72.8906	125.5	124.9	100.22	3.28125	3
27095195	R	A	186	87.1875	141	194	90.9375	140	190	89.0625	142	141.1	114.537	3.75	3
27100206	R	V	165	77.3438	140	179	83.9062	159	172	80.625	142	145.3	200.44	6.5625	3
27100058	R	A	138	64.6875	183	149	69.8438	151	143.5	67.2656	170	168.7	157.489	5.15625	3
27095326	R	A	156	73.125	164	160	75	170	158	74.0625	167	167.2	57.2686	1.875	3
27095054	R	V	186	87.1875	175	192	90	162	189	88.5938	168	168.3	85.9029	2.8125	3
27095054	R	A	177	82.9688	193	181	84.8438	185	179	83.9062	190	189.4	57.2686	1.875	3
24307	R	A	123	57.6562	162	133	62.3438	160	128	60	162	161.5	143.172	4.6875	3
24307	R	V	137	64.2188	155	143	67.0312	147	140	65.625	150	150.4	85.9029	2.8125	3
24307	R	V	152	71.25	146	159	74.5312	143	155.5	72.8906	146	145.3	100.22	3.28125	3
27100182	R	A	132	61.875	144	138	64.6875	157	135	63.2812	152	151.4	85.9029	2.8125	3
27100182	R	A	173	81.0938	186	177	82.9688	194	175	82.0312	190	190	57.2686	1.875	3
27100182	R	V	177	82.9688	194	188	88.125	187	182.5	85.5469	198.5	195.25	157.489	5.15625	3
27097307	R	A	165	77.3438	120	172	80.625	128	168.5	78.9844	121.5	122.6	100.22	3.28125	3
27099178	R	A	132	61.875	182	140	65.625	183	136	63.75	185	184	114.537	3.75	3
27099178	R	V	153	71.7188	156	158	74.0625	146	155.5	72.8906	152	151.5	71.5858	2.34375	3
27092685	R	V	163	76.4062	177	172	80.625	168	167.5	78.5156	176.5	175.1	128.854	4.21875	3
27092685	R	A	182	85.3125	148	190	89.0625	134	186	87.1875	143	141.7	114.537	3.75	3
27093432	R	A	164	76.875	195	171	80.1562	175	167.5	78.5156	186	185.5	100.22	3.28125	3
27097879	R	A	133	62.3438	108	137	64.2188	113	135	63.2812	111	110.8	57.2686	1.875	3
27097879	R	A	173	81.0938	147	185	86.7188	150	179	83.9062	144	145.9	171.806	5.625	3
27093905	R	V	128	60	135	135	63.2812	140	131.5	61.6406	138.5	138.1	100.22	3.28125	3
27093905	R	A	186	87.1875	152	192	90	139	189	88.5938	147	146.4	85.9029	2.8125	3
27095572	R	V	137	64.2188	131	147	68.9062	140	142	66.5625	138	136.7	143.172	4.6875	3
27095572	R	A	148	69.375	140	158	74.0625	129	153	71.7188	137	136.3	143.172	4.6875	3
27098427	R	A	151	70.7812	105	157	73.5938	117	154	72.1875	110	110.7	85.9029	2.8125	3
27098427	R	A	176	82.5	150	182	85.3125	141	179	83.9062	149	147.1	85.9029		3
27095974	R	V	172	80.625	155	184	86.25	161	178	83.4375	160	159.3	171.806	5.625	3
27095974	R	A	179	83.9062	161	190	89.0625	154	184.5	86.4844	160.5	159.2	157.489	5.15625	3
23271	R	V	172	80.625	126	187	87.6562	129	179.5	84.1406	128.5	128.6	214.757	7.03125	3
27095353	R	V	145	67.9688	197	153	71.7188	190	149	69.8438	198	196.2	114.537	3.75	3
27095353	R	A	153	71.7188	190	162	75.9375	159	157.5	73.8281	176	175.6	128.854	4.21875	3
27092739	R	V	180	84.375	151	185	86.7188	158	182.5	85.5469	154.5	154.3	71.5858	2.34375	3
27092739	R	A	185	86.7188	158	196	91.875	145	190.5	89.2969	156.5	154.2	157.489	5.15625	3
27099967	R	A	154	72.1875	171	161	75.4688	158	157.5	73.8281	165	164.9	100.22	3.28125	3
27099967	R	V	163	76.4062	154	175	82.0312	128	169	79.2188	142	141.7	171.806	5.625	3
12627	R	A	175	82.0312	135	180	84.375	135	177.5	83.2031	135	135	71.5858	2.34375	3
5029	R	A	130	60.9375	151	134	62.8125	158	132	61.875	154	154.2	57.2686	1.875	3
5029	R	A	156	73.125	172	161	75.4688	166	158.5	74.2969	169.5	169.5	71.5858	2.34375	3
27095453	R	A	144	67.5	145	151	70.7812	156	147.5	69.1406	152.5	151.6	100.22	3.28125	3
27095453	R	V	167	78.2812	157	173	81.0938	152	170	79.6875	154	154.4	85.9029	2.8125	3
27095453	R	A	176	82.5	150	185	86.7188	142	180.5	84.6094	146.5	146.2	128.854	4.21875	3
27099906	R	A	166	77.8125	154	173	81.0938	153	169.5	79.4531	154	153.8	100.22	3.28125	3
27099633	R	V	135	63.2812	171	143	67.0312	177	139	65.1562	175	174.6	114.537	3.75	3
27099633	R	A	162	75.9375	158	170	79.6875	135	166	77.8125	148	147	114.537	3.75	3
27092341	R	A	166	77.8125	167	176	82.5	157	171	80.1562	163	162.4	143.172	4.6875	3
27098959	R	V	129	60.4688	153	137	64.2188	167	133	62.3438	160	159.8	114.537	3.75	3
27098959	R	A	162	75.9375	174	172	80.625	167	167	78.2812	172	171.4	143.172	4.6875	3
27098782	R	V	137	64.2188	145	144	67.5	162	140.5	65.8594	154	153.8	100.22	3.28125	3
27098782	R	V	161	75.4688	166	162	75.9375	166	161.5	75.7031	166	166	14.3172	0.46875	3
27098782	R	A	169	79.2188	174	175	82.0312	176	172	80.625	177	176.1	85.9029	2.8125	3
27099717	R	V	176	82.5	154	188	88.125	149	182	85.3125	152	152.1	171.806	5.625	3
26972	R	A	133	62.3438	167	141	66.0938	187	137	64.2188	178	177.5	114.537	3.75	3
26972	R	V	147	68.9062	195	157	73.5938	192	152	71.25	197	195.4	143.172	4.6875	3
26972	R	A	165	77.3438	175	171	80.1562	156	168	78.75	167	166.3	85.9029	2.8125	3
2523	R	A	142	66.5625	178	149	69.8438	189	145.5	68.2031	185.5	184.5	100.22	3.28125	3
2523	R	V	166	77.8125	175	176	82.5	148	171	80.1562	163	162.2	143.172	4.6875	3
233	R	A	151	70.7812	191	167	78.2812	151	159	74.5312	175	173.2	229.074	7.5	3
7632	R	V	158	74.0625	187	171	80.1562	152	164.5	77.1094	173.5	172	186.123	6.09375	3
7632	R	A	183	85.7812	160	190	89.0625	192	186.5	87.4219	177.5	177	100.22	3.28125	3
27095138	R	A	173	81.0938	142	179	83.9062	154	176	82.5	147	148.2	85.9029	2.8125	3
27099362	R	A	173	81.0938	155	179	83.9062	164	176	82.5	160	160	85.9029	2.8125	3
28170	R	A	166	77.8125	204	175	82.0312	217	170.5	79.9219	214.5	212.9	128.854	4.21875	3
27099339	R	V	134	62.8125	166	142	66.5625	166	138	64.6875	168	167	114.537	3.75	3
27099339	R	A	154	72.1875	162	161	75.4688	159	157.5	73.8281	160.5	160.5	100.22	3.28125	3
27099339	R	V	179	83.9062	146	186	87.1875	123	182.5	85.5469	137	136	100.22	3.28125	3
27490	R	V	131	61.4062	191	139	65.1562	191	135	63.2812	192	191.4	114.537	3.75	3
27490	R	A	141	66.0938	189	149	69.8438	181	145	67.9688	185	185	114.537	3.75	3
27490	R	A	171	80.1562	135	175	82.0312	130	173	81.0938	133	132.6	57.2686	1.875	3
27099530	R	A	149	69.8438	114	155	72.6562	120	152	71.25	120	118.4	85.9029	2.8125	3
27098057	R	A	161	75.4688	186	171	80.1562	189	166	77.8125	189	188.2	143.172	4.6875	3
27098057	R	V	186	87.1875	174	194	90.9375	151	190	89.0625	163	162.9	114.537	3.75	3
27099412	R	V	152	71.25	142	158	74.0625	142	155	72.6562	143	142.7	85.9029	2.8125	3
27099412	R	A	186	87.1875	162	193	90.4688	175	189.5	88.8281	168	168.6	100.22	3.28125	3
27100031	R	A	157	73.5938	165	168	78.75	181	162.5	76.1719	178	176	157.489	5.15625	3
27099573	R	A	151	70.7812	173	159	74.5312	188	155	72.6562	183	181.7	114.537	3.75	3
27099573	R	V	174	81.5625	178	184	86.25	176	179	83.9062	177	177	143.172	4.6875	3
27096794	R	V	163	76.4062	132	168	78.75	134	165.5	77.5781	133.5	133.3	71.5858	2.34375	3
27096794	R	V	169	79.2188	134	182	85.3125	117	175.5	82.2656	132.5	129.4	186.123	6.09375	3
27099620	R	V	178	83.4375	167	189	88.5938	170	183.5	86.0156	172	170.6	157.489	5.15625	3
27099638	R	V	183	85.7812	182	192	90	186	187.5	87.8906	186.5	185.4	128.854	4.21875	3
27099662	R	V	162	75.9375	194	169	79.2188	192	165.5	77.5781	194	193.8	100.22	3.28125	3
27099662	R	A	178	83.4375	181	186	87.1875	170	182	85.3125	177	176.2	114.537	3.75	3
27095413	R	V	173	81.0938	151	181	84.8438	164	177	82.9688	161	159.6	114.537	3.75	3
27093371	R	V	140	65.625	122	147	68.9062	134	143.5	67.2656	130	129.1	100.22	3.28125	3
27093371	R	A	177	82.9688	152	185	86.7188	168	181	84.8438	165	162.9	114.537	3.75	3
27092999	R	V	165	77.3438	136	178	83.4375	142	171.5	80.3906	134.5	135.9	186.123	6.09375	3
1627	R	A	129	60.4688	161	138	64.6875	153	133.5	62.5781	160.5	159	128.854	4.21875	3
27099470	R	V	145	67.9688	118	157	73.5938	125	151	70.7812	124	123	171.806	5.625	3
27099572	R	V	146	68.4375	142	153	71.7188	147	149.5	70.0781	144.5	144.5	100.22	3.28125	3
27099572	R	V	168	78.75	166	177	82.9688	167	172.5	80.8594	170	168.8	128.854	4.21875	3
27099572	R	A	183	85.7812	156	192	90	137	187.5	87.8906	147	146.8	128.854	4.21875	3
27099595	R	A	153	71.7188	156	161	75.4688	148	157	73.5938	153	152.7	114.537	3.75	3
27099595	R	V	179	83.9062	147	191	89.5312	132	185	86.7188	149	144.8	171.806	5.625	3
27885	R	V	153	71.7188	141	162	75.9375	150	157.5	73.8281	146.5	145.9	128.854	4.21875	3
27885	R	A	169	79.2188	155	179	83.9062	145	174	81.5625	152	151.2	143.172	4.6875	3
27099609	R	A	149	69.8438	158	157	73.5938	153	153	71.7188	157	156.7	114.537	3.75	3
27099609	R	V	164	76.875	144	174	81.5625	139	169	79.2188	140	140.9	143.172	4.6875	3
27099609	R	A	184	86.25	139	188	88.125	134	186	87.1875	137	136.8	57.2686	1.875	3
27094378	R	V	125	58.5938	148	135	63.2812	154	130	60.9375	155	153.2	143.172	4.6875	3
27094378	R	A	182	85.3125	157	190	89.0625	133	186	87.1875	146	145.7	114.537	3.75	3
27099242	R	A	184	86.25	133	189	88.5938	131	186.5	87.4219	132	131.8	71.5858	2.34375	3
27099232	R	A	157	73.5938	160	165	77.3438	172	161	75.4688	167	166.4	114.537	3.75	3
27099232	R	V	179	83.9062	168	188	88.125	144	183.5	86.0156	157.5	156.9	128.854	4.21875	3
27092512	R	V	140	65.625	129	150	70.3125	144	145	67.9688	142	139.4	143.172	4.6875	3
27098826	R	V	132	61.875	186	144	67.5	180	138	64.6875	190	187.2	171.806	5.625	3
27098826	R	A	170	79.6875	174	180	84.375	155	175	82.0312	166	165.2	143.172	4.6875	3
27099067	R	V	138	64.6875	206	149	69.8438	212	143.5	67.2656	211.5	210.5	157.489	5.15625	3
27099067	R	A	150	70.3125	210	157	73.5938	189	153.5	71.9531	202.5	201.1	100.22	3.28125	3
27099013	R	A	147	68.9062	175	155	72.6562	173	151	70.7812	177	175.9	114.537	3.75	3
27099013	R	A	161	75.4688	161	169	79.2188	150	165	77.3438	156	155.6	114.537	3.75	3
27099147	R	A	127	59.5312	187	134	62.8125	200	130.5	61.1719	195	194.5	100.22	3.28125	3
27099147	R	V	147	68.9062	203	155	72.6562	195	151	70.7812	202	200.4	114.537	3.75	3
27099147	R	A	164	76.875	178	171	80.1562	165	167.5	78.5156	173	172.4	100.22	3.28125	3
8688	R	A	136	63.75	143	143	67.0312	164	139.5	65.3906	154.5	154.1	100.22	3.28125	3
8688	R	V	161	75.4688	173	172	80.625	184	166.5	78.0469	182.5	180.8	157.489	5.15625	3
8688	R	A	188	88.125	172	195	91.4062	161	191.5	89.7656	168.5	167.6	100.22	3.28125	3
4284	R	V	146	68.4375	124	151	70.7812	138	148.5	69.6094	131.5	131.3	71.5858	2.34375	3
4284	R	A	168	78.75	158	176	82.5	163	172	80.625	162	161.3	114.537	3.75	3
27099670	R	A	144	67.5	156	155	72.6562	145	149.5	70.0781	155.5	153.3	157.489	5.15625	3
27099670	R	V	181	84.8438	147	189	88.5938	146	185	86.7188	150	148.8	114.537	3.75	3
27099064	R	V	162	75.9375	142	169	79.2188	149	165.5	77.5781	146.5	146	100.22	3.28125	3
27099064	R	A	180	84.375	160	188	88.125	156	184	86.25	160	159.6	114.537	3.75	3
27099167	R	V	136	63.75	150	143	67.0312	160	139.5	65.3906	156.5	155.8	100.22	3.28125	3
27099167	R	A	146	68.4375	163	155	72.6562	158	150.5	70.5469	162.5	161.5	128.854	4.21875	3
27099167	R	V	181	84.8438	149	187	87.6562	129	184	86.25	141	140	85.9029	2.8125	3
27098121	R	A	128	60	166	137	64.2188	175	132.5	62.1094	171.5	171.2	128.854	4.21875	3
27098121	R	A	150	70.3125	218	159	74.5312	236	154.5	72.4219	230.5	228.9	128.854	4.21875	3
27098121	R	V	162	75.9375	238	172	80.625	228	167	78.2812	234	234	143.172	4.6875	3
27099118	R	V	158	74.0625	101	166	77.8125	102	162	75.9375	103	102.2	114.537	3.75	3
27094309	R	A	136	63.75	168	143	67.0312	150	139.5	65.3906	160.5	159.8	100.22	3.28125	3
27094309	R	A	151	70.7812	122	157	73.5938	104	154	72.1875	112	112.4	85.9029	2.8125	3
20386	R	V	155	72.6562	110	165	77.3438	127	160	75	121	120	143.172	4.6875	3
20386	R	A	171	80.1562	132	181	84.8438	109	176	82.5	126.5	124.8	143.172	4.6875	3
20386	R	V	186	87.1875	91	197	92.3438	91	191.5	89.7656	89	89.7	157.489	5.15625	3
27099159	R	A	152	71.25	135	159	74.5312	142	155.5	72.8906	138.5	138.5	100.22	3.28125	3
27099159	R	V	160	75	142	168	78.75	143	164	76.875	143	143	114.537	3.75	3
27099159	R	A	182	85.3125	120	188	88.125	117	185	86.7188	119	118.6	85.9029	2.8125	3
27092360	R	A	144	67.5	195	157	73.5938	206	150.5	70.5469	197.5	198.8	186.123	6.09375	3
27092360	R	V	171	80.1562	219	182	85.3125	199	176.5	82.7344	211	210.3	157.489	5.15625	3
17692	R	A	187	87.6562	142	195	91.4062	109	191	89.5312	126	125.7	114.537	3.75	3
27099231	R	A	185	86.7188	153	196	91.875	140	190.5	89.2969	148	147.5	157.489	5.15625	3
1924	R	A	166	77.8125	147	174	81.5625	157	170	79.6875	153	152.9	114.537	3.75	3
27099236	R	A	183	85.7812	165	191	89.5312	171	187	87.6562	172	170	114.537	3.75	3
27092116	R	V	198	92.8125	130	204	95.625	122	201	94.2188	128	126.9	85.9029	2.8125	4	0
28242	R	V	214	100.312	125	220	103.125	108	217	101.719	116	116.3	85.9029	2.8125	4	0
27093474	R	V	196	91.875	133	203	95.1562	129	199.5	93.5156	133	132.3	100.22	3.28125	4
27096056	R	V	190	89.0625	221	204	95.625	198	197	92.3438	222	217.3	200.44	6.5625	4
2506	R	A	245	114.844	85	248	116.25	86	246.5	115.547	86	85.8	42.9515	1.40625	4
27099358	R	V	191	89.5312	154	204	95.625	148	197.5	92.5781	151.5	151.1	186.123	6.09375	4
27099358	R	A	210	98.4375	164	219	102.656	187	214.5	100.547	178	176.9	128.854	4.21875	4
2223	R	A	245	114.844	71	249	116.719	73	247	115.781	73	72.4	57.2686	1.875	4
11571	R	A	248	116.25	86	251	117.656	83	249.5	116.953	85.5	85	42.9515	1.40625	4
28280	R	V	238	111.562	109	244	114.375	123	241	112.969	119	117.3	85.9029	2.8125	4
27097837	R	A	251	117.656	96	255	119.531	95	253	118.594	96	95.8	57.2686	1.875	4
27100124	R	V	195	91.4062	165	204	95.625	150	199.5	93.5156	157.5	157.8	128.854	4.21875	4
27100124	R	A	212	99.375	135	217	101.719	126	214.5	100.547	132	131.3	71.5858	2.34375	4
27100124	R	V	249	116.719	91	253	118.594	103	251	117.656	97	97	57.2686	1.875	4
27100224	R	V	207	97.0312	105	217	101.719	112	212	99.375	114	111.7	143.172	4.6875	4
27095195	R	V	194	90.9375	140	203	95.1562	121	198.5	93.0469	133	132.2	128.854	4.21875	4
27095195	R	V	230	107.812	94	236	110.625	88	233	109.219	93	92	85.9029	2.8125	4
27100206	R	A	196	91.875	144	202	94.6875	148	199	93.2812	147	146.6	85.9029	2.8125	4
27100206	R	V	205	96.0938	144	212	99.375	121	208.5	97.7344	133.5	132.9	100.22	3.28125	4
27100058	R	V	201	94.2188	116	210	98.4375	106	205.5	96.3281	113.5	112.5	128.854	4.21875	4
21215	R	V	191	89.5312	116	200	93.75	117	195.5	91.6406	118	117.2	128.854	4.21875	4
21215	R	A	201	94.2188	116	209	97.9688	106	205	96.0938	112	111.3	114.537	3.75	4
27095326	R	V	197	92.3438	126	206	96.5625	125	201.5	94.4531	136	131.4	128.854	4.21875	4
27095326	R	A	225	105.469	97	231	108.281	102	228	106.875	100	99.9	85.9029	2.8125	4
27095054	R	V	235	110.156	150	246	115.312	149	240.5	112.734	153	151.7	157.489	5.15625	4
24307	R	A	208	97.5	75	213	99.8438	77	210.5	98.6719	76.5	76.3	71.5858	2.34375	4
27100182	R	A	192	90	170	199	93.2812	133	195.5	91.6406	152	151.9	100.22	3.28125	4
27100182	R	V	214	100.312	111	221	103.594	119	217.5	101.953	115.5	115.1	100.22	3.28125	4
27097307	R	V	204	95.625	101	213	99.8438	108	208.5	97.7344	109	107.3	128.854	4.21875	4
27099178	R	V	216	101.25	107	223	104.531	109	219.5	102.891	110	109	100.22	3.28125	4
27099178	R	V	249	116.719	114	262	122.812	100	255.5	119.766	110.5	109.2	186.123	6.09375	4
27093432	R	A	225	105.469	131	230	107.812	134	227.5	106.641	133	132.8	71.5858	2.34375	4
27097879	R	V	187	87.6562	153	198	92.8125	153	192.5	90.2344	156	154.8	157.489	5.15625	4
27097879	R	A	202	94.6875	149	209	97.9688	129	205.5	96.3281	142.5	141	100.22	3.28125	4
27094531	R	A	200	93.75	154	207	97.0312	163	203.5	95.3906	159.5	159	100.22	3.28125	4
27094531	R	V	228	106.875	163	239	112.031	154	233.5	109.453	160	159.4	157.489	5.15625	4
27093905	R	V	209	97.9688	125	216	101.25	128	212.5	99.6094	127.5	127.1	100.22	3.28125	4
27093905	R	A	229	107.344	119	234	109.688	115	231.5	108.516	117	117	71.5858	2.34375	4
27095572	R	A	209	97.9688	74	213	99.8438	74	211	98.9062	76	75	57.2686	1.875	4
27095572	R	V	246	115.312	73	254	119.062	75	250	117.188	76	75.2	114.537	3.75	4
27098427	R	V	197	92.3438	133	207	97.0312	136	202	94.6875	138	136.4	143.172		4
27098427	R	A	233	109.219	139	239	112.031	138	236	110.625	140	139.3	85.9029		4
27095974	R	V	247	115.781	110	253	118.594	117	250	117.188	114	113.9	85.9029	2.8125	4
23271	R	A	192	90	131	199	93.2812	120	195.5	91.6406	128	127	100.22	3.28125	4
27095353	R	V	210	98.4375	131	216	101.25	126	213	99.8438	130	129.4	85.9029	2.8125	4
27099967	R	A	251	117.656	93	255	119.531	102	253	118.594	98	97.8	57.2686	1.875	4
12627	R	V	209	97.9688	113	217	101.719	109	213	99.8438	114	112.6	114.537	3.75	4
5029	R	V	230	107.812	127	239	112.031	131	234.5	109.922	131	130	128.854	4.21875	4
27099906	R	V	219	102.656	126	230	107.812	119	224.5	105.234	125.5	124.4	157.489	5.15625	4
27099906	R	V	249	116.719	110	257	120.469	108	253	118.594	107	107.9	114.537	3.75	4
27099633	R	V	229	107.344	98	235	110.156	97	232	108.75	99	98.3	85.9029	2.8125	4
27092341	R	V	198	92.8125	139	210	98.4375	113	204	95.625	129	127.8	171.806	5.625	4
27098959	R	V	196	91.875	147	205	96.0938	134	200.5	93.9844	143	141.9	128.854	4.21875	4
27099717	R	A	198	92.8125	146	207	97.0312	135	202.5	94.9219	142.5	141.8	128.854	4.21875	4
233	R	V	190	89.0625	157	201	94.2188	132	195.5	91.6406	149	147.3	157.489	5.15625	4
7632	R	V	223	104.531	144	230	107.812	145	226.5	106.172	146.5	145.6	100.22	3.28125	4
27095138	R	V	209	97.9688	136	218	102.188	125	213.5	100.078	135.5	133.1	128.854	4.21875	4
27099362	R	V	187	87.6562	167	198	92.8125	161	192.5	90.2344	168	166.3	157.489	5.15625	4
27099362	R	A	215	100.781	155	223	104.531	148	219	102.656	155	153.4	114.537	3.75	4
28170	R	V	193	90.4688	190	207	97.0312	151	200	93.75	171	170.7	200.44	6.5625	4
27490	R	V	227	106.406	99	233	109.219	101	230	107.812	101	100.4	85.9029	2.8125	4
27099530	R	V	200	93.75	144	212	99.375	143	206	96.5625	148	146.3	171.806	5.625	4
27098057	R	A	194	90.9375	151	201	94.2188	135	197.5	92.5781	142	142.5	100.22	3.28125	4
27099412	R	A	197	92.3438	176	201	94.2188	169	199	93.2812	173	172.8	57.2686	1.875	4
27099412	R	V	204	95.625	159	211	98.9062	143	207.5	97.2656	150.5	150.1	100.22	3.28125	4
27100031	R	V	190	89.0625	156	202	94.6875	140	196	91.875	152	150.5	171.806	5.625	4
27099573	R	A	253	118.594	154	258	120.938	153	255.5	119.766	155	154.3	71.5858	2.34375	4
27096794	R	A	203	95.1562	122	212	99.375	128	207.5	97.2656	131	128.7	128.854	4.21875	4
27099620	R	A	203	95.1562	157	211	98.9062	155	207	97.0312	158	157.3	114.537	3.75	4
27099638	R	A	187	87.6562	186	199	93.2812	175	193	90.4688	185	183.4	171.806	5.625	4
27099662	R	A	207	97.0312	148	212	99.375	148	209.5	98.2031	149	148.7	71.5858	2.34375	4
27099662	R	V	212	99.375	148	219	102.656	136	215.5	101.016	144	143.1	100.22	3.28125	4
27099662	R	V	249	116.719	127	256	120	128	252.5	118.359	128	127.9	100.22	3.28125	4
27096821	R	V	193	90.4688	144	206	96.5625	155	199.5	93.5156	143.5	146	186.123	6.09375	4
27096821	R	A	209	97.9688	163	216	101.25	166	212.5	99.6094	168	166.6	100.22	3.28125	4
27096821	R	V	228	106.875	135	235	110.156	116	231.5	108.516	126	125.8	100.22	3.28125	4
27095413	R	V	195	91.4062	164	204	95.625	168	199.5	93.5156	167	166.6	128.854	4.21875	4
27095413	R	A	243	113.906	136	246	115.312	140	244.5	114.609	138	138	42.9515	1.40625	4
27093371	R	A	250	117.188	128	256	120	139	253	118.594	137	135	85.9029	2.8125	4
27092999	R	A	195	91.4062	174	200	93.75	149	197.5	92.5781	164	162.5	71.5858	2.34375	4
27092999	R	A	244	114.375	69	246	115.312	69	245	114.844	69	68	28.6343	0.9375	4
1627	R	V	198	92.8125	111	211	98.9062	114	204.5	95.8594	115	114.1	186.123	6.09375	4
27093728	R	V	192	90	138	199	93.2812	147	195.5	91.6406	144	143	100.22	3.28125	4
27093728	R	A	199	93.2812	147	206	96.5625	144	202.5	94.9219	147	146.3	100.22	3.28125	4
27093728	R	V	209	97.9688	140	215	100.781	127	212	99.375	135	134.6	85.9029	2.8125	4
27099470	R	A	195	91.4062	165	206	96.5625	151	200.5	93.9844	162.5	160.8	157.489	5.15625	4
27099470	R	V	218	102.188	131	226	105.938	122	222	104.062	128	127.3	114.537	3.75	4
27099595	R	V	214	100.312	93	223	104.531	100	218.5	102.422	99.5	98.1	128.854	4.21875	4
27885	R	V	216	101.25	93	225	105.469	87	220.5	103.359	91.5	91	128.854	4.21875	4
27099609	R	A	228	106.875	107	234	109.688	108	231	108.281	108	107.6	85.9029	2.8125	4
27094378	R	V	214	100.312	111	222	104.062	111	218	102.188	112	111.7	114.537	3.75	4
27099242	R	V	188	88.125	131	200	93.75	124	194	90.9375	131	129.5	171.806	5.625	4
27099242	R	A	204	95.625	119	210	98.4375	116	207	97.0312	118	117.6	85.9029	2.8125	4
27099232	R	V	235	110.156	95	243	113.906	102	239	112.031	99	98.8	114.537	3.75	4
27092512	R	A	201	94.2188	137	210	98.4375	130	205.5	96.3281	134.5	134.1	128.854	4.21875	4
27092512	R	V	219	102.656	129	227	106.406	117	223	104.531	124	123.4	114.537	3.75	4
27098826	R	V	234	109.688	110	242	113.438	115	238	111.562	114	113.4	114.537	3.75	4
27099067	R	V	229	107.344	112	233	109.219	111	231	108.281	112	111.6	57.2686	1.875	4
27099013	R	V	237	111.094	92	249	116.719	93	243	113.906	95	93.9	171.806	5.625	4
8688	R	V	241	112.969	108	249	116.719	111	245	114.844	111	110.3	114.537	3.75	4
4284	R	V	212	99.375	129	221	103.594	108	216.5	101.484	121	120	128.854	4.21875	4
27099064	R	V	227	106.406	105	235	110.156	107	231	108.281	111	108.9	114.537	3.75	4
27098121	R	A	192	90	180	197	92.3438	171	194.5	91.1719	176	175.7	71.5858	2.34375	4
27099118	R	A	216	101.25	143	222	104.062	147	219	102.656	147	145.9	85.9029	2.8125	4
20386	R	A	219	102.656	95	225	105.469	92	222	104.062	96	94.7	85.9029	2.8125	4
27099159	R	V	208	97.5	95	215	100.781	98	211.5	99.1406	98	97.5	100.22	3.28125	4
17692	R	V	213	99.8438	97	224	105	102	218.5	102.422	118	110.4	157.489	5.15625	4
27099231	R	V	196	91.875	140	205	96.0938	120	200.5	93.9844	131	130.7	128.854	4.21875	4
1924	R	V	191	89.5312	139	201	94.2188	117	196	91.875	129	128.5	143.172	4.6875	4
1924	R	A	228	106.875	129	233	109.219	114	230.5	108.047	123	122.2	71.5858	2.34375	4
27099236	R	V	193	90.4688	167	201	94.2188	135	197	92.3438	154	152.7	114.537	3.75	4
27099236	R	A	219	102.656	111	225	105.469	107	222	104.062	112	110.6	85.9029	2.8125	4
27092116	R	V	288	135	107	296	138.75	127	292	136.875	119	117.9	114.537	3.75	5	1
28242	R	A	289	135.469	120	295	138.281	115	292	136.875	120	118.7	85.9029	2.8125	5	0
28242	R	V	315	147.656	111	322	150.938	118	318.5	149.297	115.5	115.1	100.22	3.28125	5	1
27093474	R	A	269	126.094	106	276	129.375	111	272.5	127.734	110	109.4	100.22	3.28125	5
27093474	R	V	286	134.062	107	291	136.406	104	288.5	135.234	106	105.8	71.5858	2.34375	5
2506	R	A	289	135.469	83	293	137.344	82	291	136.406	83	82.8	57.2686	1.875	5
27099358	R	A	302	141.562	135	312	146.25	142	307	143.906	142	140.5	143.172	4.6875	5
27099358	R	A	310	145.312	142	317	148.594	137	313.5	146.953	141	140.5	100.22	3.28125	5
2223	R	A	306	143.438	117	310	145.312	122	308	144.375	119	119.4	57.2686	1.875	5
27099587	R	A	298	139.688	132	303	142.031	126	300.5	140.859	129.5	129.2	71.5858	2.34375	5
27099587	R	V	308	144.375	124	314	147.188	123	311	145.781	124	123.9	85.9029	2.8125	5
11571	R	A	265	124.219	80	271	127.031	81	268	125.625	80	80.3	85.9029	2.8125	5
11571	R	A	303	142.031	84	308	144.375	85	305.5	143.203	86.5	85.5	71.5858	2.34375	5
27092948	R	V	306	143.438	115	310	145.312	114	308	144.375	115	114.8	57.2686	1.875	5
28280	R	A	259	121.406	143	262	122.812	144	260.5	122.109	144	143.6	42.9515	1.40625	5
28280	R	A	281	131.719	138	285	133.594	139	283	132.656	139	138.8	57.2686	1.875	5
28280	R	A	314	147.188	122	319	149.531	129	316.5	148.359	127	126.3	71.5858	2.34375	5
27616	R	V	308	144.375	131	314	147.188	133	311	145.781	133	132.4	85.9029	2.8125	5
27616	R	A	314	147.188	133	320	150	128	317	148.594	131	130.7	85.9029	2.8125	5
27097837	R	V	266	124.688	94	270	126.562	87	268	125.625	91	90.4	57.2686	1.875	5
27097837	R	A	306	143.438	101	312	146.25	111	309	144.844	107	106.6	85.9029	2.8125	5
27100124	R	V	300	140.625	152	308	144.375	133	304	142.5	145	143.8	114.537	3.75	5
27100114	R	A	269	126.094	134	275	128.906	128	272	127.5	134	132.4	85.9029	2.8125	5
27100114	R	V	302	141.562	131	305	142.969	130	303.5	142.266	130.5	130.5	42.9515	1.40625	5
18850	R	A	277	129.844	113	282	132.188	108	279.5	131.016	111	110.1	71.5858	2.34375	5
18850	R	V	314	147.188	99	320	150	109	317	148.594	106	105	85.9029	2.8125	5
27100224	R	V	255	119.531	117	261	122.344	111	258	120.938	115	114.7	85.9029	2.8125	5
27100224	R	A	286	134.062	99	291	136.406	92	288.5	135.234	97	96.3	71.5858	2.34375	5
27095195	R	A	282	132.188	108	287	134.531	117	284.5	133.359	113	113	71.5858	2.34375	5
27095195	R	V	317	148.594	130	322	150.938	126	319.5	149.766	129.5	129	71.5858	2.34375	5
27100206	R	V	267	125.156	148	277	129.844	143	272	127.5	152	149.4	143.172	4.6875	5
27100206	R	A	289	135.469	118	292	136.875	113	290.5	136.172	116	115.8	42.9515	1.40625	5
27100058	R	A	281	131.719	89	286	134.062	108	283.5	132.891	100	99.3	71.5858	2.34375	5
27100058	R	V	289	135.469	106	294	137.812	89	291.5	136.641	97.5	97.5	71.5858	2.34375	5
21215	R	V	256	120	93	275	128.906	102	265.5	124.453	106	102.3	272.026	8.90625	5
27095326	R	V	265	124.219	107	272	127.5	116	268.5	125.859	112.5	112.1	100.22	3.28125	5
27095326	R	A	284	133.125	122	288	135	118	286	134.062	120	120	57.2686	1.875	5
27095054	R	A	277	129.844	138	284	133.125	132	280.5	131.484	137.2	136.4	100.22	3.28125	5
24307	R	V	281	131.719	82	286	134.062	85	283.5	132.891	84.5	84.2	71.5858	2.34375	5
24307	R	A	310	145.312	96	315	147.656	101	312.5	146.484	101.5	100	71.5858	2.34375	5
27100182	R	A	310	145.312	152	318	149.062	149	314	147.188	154	152.4	114.537	3.75	5
27097307	R	A	284	133.125	105	289	135.469	115	286.5	134.297	110	110	71.5858	2.34375	5
27097307	R	V	302	141.562	121	308	144.375	116	305	142.969	119	118.7	85.9029	2.8125	5
27099178	R	A	294	137.812	99	300	140.625	103	297	139.219	105	103.4	85.9029	2.8125	5
27092685	R	V	254	119.062	89	258	120.938	95	256	120	93	92.4	57.2686	1.875	5
27092685	R	A	284	133.125	97	289	135.469	92	286.5	134.297	95.5	94.8	71.5858	2.34375	5
27093432	R	A	279	130.781	158	282	132.188	155	280.5	131.484	156.5	156.5	42.9515	1.40625	5
27093432	R	V	301	141.094	131	307	143.906	124	304	142.5	128	127.9	85.9029	2.8125	5
27097879	R	V	280	131.25	131	290	135.938	139	285	133.594	137	136.3	143.172	4.6875	5
27097879	R	A	313	146.719	125	318	149.062	125	315.5	147.891	125	125	71.5858	2.34375	5
27094531	R	A	301	141.094	109	305	142.969	109	303	142.031	109	109	57.2686	1.875	5
27093905	R	V	288	135	159	294	137.812	156	291	136.406	158	157.6	85.9029	2.8125	5
27093905	R	A	299	140.156	151	305	142.969	143	302	141.562	148	147.3	85.9029	2.8125	5
27095572	R	A	279	130.781	83	284	133.125	92	281.5	131.953	88	87.8	71.5858	2.34375	5
27095974	R	A	286	134.062	98	288	135	96	287	134.531	97	97	28.6343	0.9375	5
27095974	R	V	309	144.844	123	317	148.594	137	313	146.719	133	132.1	114.537	3.75	5
27095974	R	A	316	148.125	137	323	151.406	135	319.5	149.766	138	137	100.22	3.28125	5
23271	R	V	292	136.875	91	301	141.094	97	296.5	138.984	95	94.6	128.854	4.21875	5
23271	R	A	298	139.688	96	302	141.562	98	300	140.625	97	96.8	57.2686	1.875	5
27095353	R	A	314	147.188	116	319	149.531	114	316.5	148.359	115.5	115.3	71.5858	2.34375	5
27092739	R	A	272	127.5	105	278	130.312	113	275	128.906	109	109.1	85.9029	2.8125	5
27092739	R	V	294	137.812	131	305	142.969	113	299.5	140.391	127	124.8	157.489	5.15625	5
27099967	R	A	305	142.969	81	306	143.438	83	305.5	143.203	82	82	14.3172	0.46875	5
12627	R	A	270	126.562	88	275	128.906	87	272.5	127.734	87	87.3	71.5858	2.34375	5
12627	R	V	295	138.281	79	300	140.625	85	297.5	139.453	81.5	81.8	71.5858	2.34375	5
5029	R	A	269	126.094	152	274	128.438	153	271.5	127.266	154.5	153.5	71.5858	2.34375	5
5029	R	V	308	144.375	162	315	147.656	140	311.5	146.016	155.5	153.5	100.22	3.28125	5
27095453	R	V	262	122.812	136	271	127.031	151	266.5	124.922	142	142.6	128.854	4.21875	5
27095453	R	A	273	127.969	156	280	131.25	161	276.5	129.609	160.5	159.5	100.22	3.28125	5
27099906	R	A	292	136.875	122	299	140.156	117	295.5	138.516	121.5	120.8	100.22	3.28125	5
27099906	R	A	295	138.281	122	298	139.688	119	296.5	138.984	121	120.8	42.9515	1.40625	5
27099633	R	A	265	124.219	105	270	126.562	102	267.5	125.391	104	103.8	71.5858	2.34375	5
27092341	R	A	303	142.031	84	306	143.438	82	304.5	142.734	82.5	82.8	42.9515	1.40625	5
27098959	R	A	268	125.625	115	274	128.438	107	271	127.031	111	111.3	85.9029	2.8125	5
27098959	R	V	306	143.438	123	312	146.25	127	309	144.844	126	125.6	85.9029	2.8125	5
27098782	R	A	276	129.375	131	281	131.719	138	278.5	130.547	137	135.8	71.5858	2.34375	5
27099717	R	V	261	122.344	102	268	125.625	104	264.5	123.984	104	103.8	100.22	3.28125	5
26972	R	A	281	131.719	95	287	134.531	95	284	133.125	96	95.1	85.9029	2.8125	5
26972	R	V	308	144.375	88	314	147.188	87	311	145.781	88	87.6	85.9029	2.8125	5
2523	R	A	260	121.875	124	265	124.219	117	262.5	123.047	121	120.8	71.5858	2.34375	5
233	R	A	285	133.594	138	293	137.344	151	289	135.469	149	146.9	114.537	3.75	5
233	R	V	306	143.438	132	313	146.719	129	309.5	145.078	131	130.6	100.22	3.28125	5
7632	R	A	266	124.688	151	272	127.5	152	269	126.094	152	151.7	85.9029	2.8125	5
7632	R	V	276	129.375	153	283	132.656	156	279.5	131.016	155.5	155.1	100.22	3.28125	5
7632	R	A	288	135	149	293	137.344	140	290.5	136.172	144.5	144.5	71.5858	2.34375	5
27095138	R	A	290	135.938	110	296	138.75	109	293	137.344	110	110	85.9029	2.8125	5
27095138	R	A	315	147.656	113	322	150.938	131	318.5	149.297	127	124.9	100.22	3.28125	5
27099362	R	A	286	134.062	144	291	136.406	154	288.5	135.234	150	149.3	71.5858	2.34375	5
27099362	R	V	295	138.281	156	302	141.562	148	298.5	139.922	153.5	153	100.22	3.28125	5
28170	R	A	285	133.594	132	292	136.875	132	288.5	135.234	134	133.3	100.22	3.28125	5
27099339	R	A	287	134.531	97	293	137.344	106	290	135.938	101	101.3	85.9029	2.8125	5
27099339	R	V	306	143.438	124	314	147.188	107	310	145.312	118	117.1	114.537	3.75	5
27490	R	V	278	130.312	100	284	133.125	103	281	131.719	103	102.4	85.9029	2.8125	5
27099530	R	A	293	137.344	103	298	139.688	103	295.5	138.516	74	103.5	71.5858	2.34375	5
27099530	R	A	313	146.719	99	317	148.594	100	315	147.656	100	99.8	57.2686	1.875	5
27098057	R	A	267	125.156	127	273	127.969	115	270	126.562	122	121.6	85.9029	2.8125	5
27098057	R	V	302	141.562	110	309	144.844	121	305.5	143.203	117	116.3	100.22	3.28125	5
27099412	R	A	272	127.5	115	276	129.375	111	274	128.438	114	113.6	57.2686	1.875	5
27099412	R	V	312	146.25	66	319	149.531	72	315.5	147.891	69	68.8	100.22	3.28125	5
27100031	R	A	259	121.406	91	264	123.75	90	261.5	122.578	91	90.7	71.5858	2.34375	5
27096794	R	A	260	121.875	106	265	124.219	112	262.5	123.047	110.5	109.8	71.5858	2.34375	5
27096794	R	V	274	128.438	97	280	131.25	95	277	129.844	94	95	85.9029	2.8125	5
27099620	R	V	283	132.656	103	288	135	98	285.5	133.828	101.5	101.2	71.5858	2.34375	5
27099620	R	A	302	141.562	105	309	144.844	110	305.5	143.203	109.5	108.6	100.22	3.28125	5
27099638	R	A	261	122.344	140	268	125.625	135	264.5	123.984	139.5	138.5	100.22	3.28125	5
27099638	R	A	296	138.75	160	302	141.562	156	299	140.156	159	158.6	85.9029	2.8125	5
27099662	R	A	278	130.312	117	283	132.656	122	280.5	131.484	120.5	120	71.5858	2.34375	5
27099662	R	V	314	147.188	132	322	150.938	128	318	149.062	131	130.8	114.537	3.75	5
27095413	R	A	259	121.406	140	262	122.812	135	260.5	122.109	138	137.8	42.9515	1.40625	5
27095413	R	A	296	138.75	110	300	140.625	106	298	139.688	109	108.4	57.2686	1.875	5
27095413	R	A	318	149.062	113	321	150.469	115	319.5	149.766	114.5	114.3	42.9515	1.40625	5
27093371	R	V	259	121.406	138	266	124.688	125	262.5	123.047	132	131.9	100.22	3.28125	5
27092999	R	A	264	123.75	89	267	125.156	89	265.5	124.453	89.5	89.3	42.9515	1.40625	5
27092999	R	V	294	137.812	94	300	140.625	91	297	139.219	94	93.3	85.9029	2.8125	5
1627	R	A	300	140.625	105	305	142.969	103	302.5	141.797	104	103.8	71.5858	2.34375	5
27093728	R	V	261	122.344	102	269	126.094	105	265	124.219	105	104.6	114.537	3.75	5
27093728	R	A	305	142.969	101	311	145.781	99	308	144.375	101	100.6	85.9029	2.8125	5
27099470	R	A	284	133.125	123	288	135	127	286	134.062	126	125.6	57.2686	1.875	5
27099572	R	A	259	121.406	83	265	124.219	93	262	122.812	88	88.3	85.9029	2.8125	5
27099572	R	V	287	134.531	101	295	138.281	111	291	136.406	108	107.1	114.537	3.75	5
27099595	R	A	295	138.281	115	301	141.094	109	298	139.688	113	112.6	85.9029	2.8125	5
27099609	R	A	297	139.219	138	303	142.031	143	300	140.625	143	141.7	85.9029	2.8125	5
27099609	R	V	306	143.438	138	312	146.25	121	309	144.844	130	129.9	85.9029	2.8125	5
27094378	R	A	267	125.156	127	274	128.438	122	270.5	126.797	124.5	124.3	100.22	3.28125	5
27099242	R	V	264	123.75	93	270	126.562	91	267	125.156	93	93.6	85.9029	2.8125	5
27099242	R	A	297	139.219	83	300	140.625	81	298.5	139.922	82.5	82.3	42.9515	1.40625	5
27099232	R	A	268	125.625	133	273	127.969	141	270.5	126.797	138	137.5	71.5858	2.34375	5
27099232	R	V	301	141.094	128	306	143.438	126	303.5	142.266	128	127.5	71.5858	2.34375	5
27098826	R	A	291	136.406	143	298	139.688	146	294.5	138.047	146	145.3	100.22	3.28125	5
27098826	R	V	302	141.562	142	313	146.719	142	307.5	144.141	136	138.4	157.489	5.15625	5
27099067	R	V	306	143.438	108	315	147.656	108	310.5	145.547	110.5	109.4	128.854	4.21875	5
27099013	R	A	295	138.281	113	303	142.031	143	299	140.156	132	130.3	114.537	3.75	5
27099013	R	A	303	142.031	143	312	146.25	137	307.5	144.141	141.5	141	128.854	4.21875	5
27099147	R	A	284	133.125	115	290	135.938	125	287	134.531	122	120.9	85.9029	2.8125	5
27099147	R	V	304	142.5	137	315	147.656	124	309.5	145.078	135.5	133.7	157.489	5.15625	5
8688	R	A	309	144.844	123	316	148.125	121	312.5	146.484	125.5	124	100.22	3.28125	5
4284	R	A	291	136.406	113	297	139.219	108	294	137.812	110	110.1	85.9029	2.8125	5
27099670	R	A	277	129.844	130	284	133.125	128	280.5	131.484	131.5	130.5	100.22	3.28125	5
27099670	R	V	301	141.094	122	309	144.844	128	305	142.969	127	126.2	114.537	3.75	5
27099064	R	A	272	127.5	112	279	130.781	114	275.5	129.141	116	114.6	100.22	3.28125	5
27099064	R	V	288	135	98	294	137.812	93	291	136.406	96	95.9	85.9029	2.8125	5
27099167	R	V	262	122.812	122	267	125.156	128	264.5	123.984	125	125	71.5858	2.34375	5
27099167	R	A	267	125.156	128	274	128.438	130	270.5	126.797	130.5	129.9	100.22	3.28125	5
27098121	R	V	304	142.5	174	312	146.25	190	308	144.375	186	184.4	114.537	3.75	5
27099118	R	V	260	121.875	105	267	125.156	102	263.5	123.516	104	103.8	100.22	3.28125	5
27099118	R	A	292	136.875	158	296	138.75	160	294	137.812	161	160	57.2686	1.875	5
27099118	R	V	311	145.781	140	317	148.594	145	314	147.188	143	142.7	85.9029	2.8125	5
27094309	R	V	276	129.375	85	284	133.125	108	280	131.25	98	97.4	114.537	3.75	5
27094309	R	A	299	140.156	123	304	142.5	117	301.5	141.328	121.5	120.8	71.5858	2.34375	5
20386	R	V	303	142.031	88	307	143.906	88	305	142.969	88	88	57.2686	1.875	5
20386	R	V	312	146.25	85	317	148.594	85	314.5	147.422	85	85	71.5858	2.34375	5
27099159	R	A	259	121.406	111	265	124.219	107	262	122.812	112	110.6	85.9029	2.8125	5
27099159	R	V	295	138.281	89	300	140.625	90	297.5	139.453	87.5	88.5	71.5858	2.34375	5
27099159	R	A	300	140.625	90	305	142.969	94	302.5	141.797	93.5	92.8	71.5858	2.34375	5
27092360	R	V	308	144.375	117	314	147.188	126	311	145.781	122	121.9	85.9029	2.8125	5
17692	R	A	278	130.312	51	283	132.656	50	280.5	131.484	51	50.7	71.5858	2.34375	5
27099231	R	V	253	118.594	113	260	121.875	117	256.5	120.234	116.5	115.9	100.22	3.28125	5
27099231	R	A	295	138.281	137	300	140.625	141	297.5	139.453	141.5	140.3	71.5858	2.34375	5
1924	R	A	279	130.781	114	285	133.594	119	282	132.188	118	117.4	85.9029	2.8125	5
1924	R	A	314	147.188	95	319	149.531	100	316.5	148.359	98.5	98.2	71.5858	2.34375	5
27099236	R	V	290	135.938	123	295	138.281	125	292.5	137.109	125.5	124.8	71.5858	2.34375	5
27099236	R	A	311	145.781	113	316	148.125	107	313.5	146.953	111.5	110.8	71.5858	2.34375	5
27092116	R	A	356	166.875	86	360	168.75	80	358	167.812	84	83.4	57.2686	1.875	6	0
27093474	R	A	334	156.562	97	339	158.906	100	336.5	157.734	99	98.8	71.5858	2.34375	6
27096056	R	A	317	148.594	69	323	151.406	80	320	150	76	75.1	85.9029	2.8125	6
27096056	R	V	365	171.094	72	371	173.906	73	368	172.5	75	73.7	85.9029	2.8125	6
2506	R	V	334	156.562	81	340	159.375	81	337	157.969	82	81.4	85.9029	2.8125	6
27099358	R	A	351	164.531	87	357	167.344	86	354	165.938	87	86.9	85.9029	2.8125	6
2223	R	A	329	154.219	146	338	158.438	143	333.5	156.328	148	146.6	128.854	4.21875	6
11571	R	V	346	162.188	70	354	165.938	69	350	164.062	71	70.4	114.537	3.75	6
27092948	R	A	327	153.281	106	331	155.156	102	329	154.219	104	104	57.2686	1.875	6
27092948	R	V	346	162.188	102	350	164.062	99	348	163.125	102	101	57.2686	1.875	6
28280	R	V	353	165.469	84	361	169.219	80	357	167.344	90	86.7	114.537	3.75	6
27100124	R	A	335	157.031	106	339	158.906	105	337	157.969	107	106.2	57.2686	1.875	6
27100124	R	A	378	177.188	91	382	179.062	90	380	178.125	92	91.2	57.2686	1.875	6
27100114	R	A	321	150.469	139	325	152.344	142	323	151.406	141	140.8	57.2686	1.875	6
27100114	R	V	329	154.219	139	333	156.094	128	331	155.156	134	133.8	57.2686	1.875	6
27100224	R	A	335	157.031	72	339	158.906	70	337	157.969	71	71.2	57.2686	1.875	6
27095195	R	A	337	157.969	119	342	160.312	119	339.5	159.141	120	119.5	71.5858	2.34375	6
27100206	R	A	336	157.5	112	340	159.375	111	338	158.438	113	112.2	57.2686	1.875	6
27100206	R	A	352	165	108	357	167.344	117	354.5	166.172	113	112.8	71.5858	2.34375	6
27100058	R	A	341	159.844	91	349	163.594	114	345	161.719	102	102.3	114.537	3.75	6
27100058	R	V	354	165.938	119	359	168.281	99	356.5	167.109	110	109.7	71.5858	2.34375	6
24307	R	A	338	158.438	77	341	159.844	74	339.5	159.141	76	75.6	42.9515	1.40625	6
27100182	R	V	342	160.312	143	351	164.531	125	346.5	162.422	134.5	134.3	128.854	4.21875	6
27100182	R	V	355	166.406	118	359	168.281	112	357	167.344	115	115	57.2686	1.875	6
27097307	R	V	326	152.812	118	330	154.688	123	328	153.75	121	120.8	57.2686	1.875	6
27097307	R	A	351	164.531	115	357	167.344	107	354	165.938	114	112.4	85.9029	2.8125	6
27092685	R	V	340	159.375	93	347	162.656	101	343.5	161.016	98.5	97.25	100.22	3.28125	6
27092685	R	A	361	169.219	109	365	171.094	108	363	170.156	109	108.8	57.2686	1.875	6
27097879	R	A	349	163.594	78	354	165.938	83	351.5	164.766	81.5	80.8	71.5858	2.34375	6
27094531	R	V	345	161.719	89	350	164.062	83	347.5	162.891	86.5	86.2	71.5858	2.34375	6
27094531	R	A	369	172.969	84	373	174.844	84	371	173.906	85	84.4	57.2686	1.875	6
27093905	R	V	337	157.969	127	344	161.25	127	340.5	159.609	129	128.1	100.22	3.28125	6
27093905	R	A	363	170.156	123	370	173.438	119	366.5	171.797	124	122.9	100.22	3.28125	6
27095572	R	V	330	154.688	82	336	157.5	92	333	156.094	89	87.9	85.9029	2.8125	6
27098427	R	A	355	166.406	49	360	168.75	53	357.5	167.578	51.5	51.3	71.5858		6
27095974	R	A	342	160.312	115	346	162.188	109	344	161.25	113	112.4	57.2686	1.875	6
23271	R	A	336	157.5	124	341	159.844	116	338.5	158.672	122	121.2	71.5858	2.34375	6
23271	R	A	360	168.75	78	363	170.156	80	361.5	169.453	79.5	79.3	42.9515	1.40625	6
27095353	R	V	345	161.719	144	351	164.531	127	348	163.125	140	138	85.9029	2.8125	6
27095353	R	A	364	170.625	75	368	172.5	72	366	171.562	74	73.6	57.2686	1.875	6
27092739	R	A	350	164.062	101	353	165.469	97	351.5	164.766	99.5	99.3	42.9515	1.40625	6
27099967	R	V	327	153.281	82	331	155.156	89	329	154.219	86	85.6	57.2686	1.875	6
27099967	R	A	359	168.281	85	365	171.094	81	362	169.688	85	84.1	85.9029	2.8125	6
12627	R	A	343	160.781	65	349	163.594	71	346	162.188	65	66.4	85.9029	2.8125	6
12627	R	V	349	163.594	71	354	165.938	82	351.5	164.766	78	77.3	71.5858	2.34375	6
5029	R	A	353	165.469	72	355	166.406	73	354	165.938	72	72.3	28.6343	0.9375	6
5029	R	V	379	177.656	69	381	178.594	70	380	178.125	70	69.7	28.6343	0.9375	6
27099633	R	A	360	168.75	107	365	171.094	116	362.5	169.922	111.5	111.5	71.5858	2.34375	6
27099633	R	V	377	176.719	117	384	180	106	380.5	178.359	113.5	112.8	100.22	3.28125	6
27092341	R	A	337	157.969	105	342	160.312	109	339.5	159.141	107.5	107.3	71.5858	2.34375	6
27092341	R	A	359	168.281	106	367	172.031	100	363	170.156	105	104.1	114.537	3.75	6
27098959	R	A	341	159.844	109	346	162.188	100	343.5	161.016	104.5	104.5	71.5858	2.34375	6
27098782	R	A	341	159.844	92	345	161.719	85	343	160.781	89	88.8	57.2686	1.875	6
27099717	R	A	318	149.062	124	323	151.406	124	320.5	150.234	125	124.3	71.5858	2.34375	6
27099717	R	A	327	153.281	119	331	155.156	112	329	154.219	116	329	57.2686	1.875	6
27099717	R	A	348	163.125	111	351	164.531	113	349.5	163.828	112	112	42.9515	1.40625	6
2523	R	V	317	148.594	99	323	151.406	96	320	150	99	98.4	85.9029	2.8125	6
2523	R	A	348	163.125	81	352	165	83	350	164.062	82	81.8	57.2686	1.875	6
27095138	R	V	358	167.812	110	365	171.094	107	361.5	169.453	110	109.3	100.22	3.28125	6
28170	R	V	327	153.281	144	336	157.5	127	331.5	155.391	137.5	136.6	128.854	4.21875	6
27099339	R	V	342	160.312	98	347	162.656	97	344.5	161.484	98.5	98.2	71.5858	2.34375	6
27099339	R	A	350	164.062	97	356	166.875	106	353	165.469	101	101.3	85.9029	2.8125	6
27099530	R	A	351	164.531	77	355	166.406	75	353	165.469	77	76.4	57.2686	1.875	6
27098057	R	A	325	152.344	102	331	155.156	94	328	153.75	98	98.1	85.9029	2.8125	6
27098057	R	V	359	168.281	73	365	171.094	71	362	169.688	70	71	85.9029	2.8125	6
27098057	R	A	378	177.188	77	383	179.531	78	380.5	178.359	78	77.8	71.5858	2.34375	6
27099412	R	A	339	158.906	82	344	161.25	78	341.5	160.078	81.5	80.8	71.5858	2.34375	6
27100031	R	A	322	150.938	104	325	152.344	104	323.5	151.641	104	104	42.9515	1.40625	6
27100031	R	A	343	160.781	106	347	162.656	105	345	161.719	106	105.6	57.2686	1.875	6
27100031	R	A	364	170.625	102	369	172.969	99	366.5	171.797	101.5	101	71.5858	2.34375	6
27099573	R	A	322	150.938	108	327	153.281	108	324.5	152.109	109	108.3	71.5858	2.34375	6
27099573	R	V	337	157.969	103	343	160.781	92	340	159.375	98	97.9	85.9029	2.8125	6
27096794	R	A	320	150	110	327	153.281	117	323.5	151.641	115.5	114.6	100.22	3.28125	6
27096794	R	A	348	163.125	111	351	164.531	110	349.5	163.828	111	110.8	42.9515	1.40625	6
27099620	R	V	325	152.344	134	335	157.031	129	330	154.688	140	136.5	143.172	4.6875	6
27099638	R	A	339	158.906	92	342	160.312	85	340.5	159.609	89	88.8	42.9515	1.40625	6
27099638	R	A	376	176.25	73	380	178.125	73	378	177.188	73	73	57.2686	1.875	6
27099662	R	A	324	151.875	127	329	154.219	122	326.5	153.047	124.5	124.5	71.5858	2.34375	6
27099662	R	A	374	175.312	96	381	178.594	94	377.5	176.953	95.5	95.4	100.22	3.28125	6
27096821	R	A	333	156.094	155	340	159.375	160	336.5	157.734	159.5	158.6	100.22	3.28125	6
27096821	R	V	341	159.844	159	349	163.594	142	345	161.719	152	151.2	114.537	3.75	6
27093371	R	V	344	161.25	59	351	164.531	59	347.5	162.891	62	60.5	100.22	3.28125	6
27092999	R	A	343	160.781	101	347	162.656	103	345	161.719	103	102.6	57.2686	1.875	6
27092999	R	A	355	166.406	91	357	167.344	86	356	166.875	88	88.3	28.6343	0.9375	6
1627	R	V	326	152.812	106	335	157.031	111	330.5	154.922	109	108.7	128.854	4.21875	6
27093728	R	V	373	174.844	65	378	177.188	68	375.5	176.016	68.5	67.5	71.5858	2.34375	6
27099470	R	A	324	151.875	113	329	154.219	106	326.5	153.047	111.5	110.7	71.5858	2.34375	6
27099572	R	A	319	149.531	119	323	151.406	123	321	150.469	121	121	57.2686	1.875	6
27099572	R	A	363	170.156	106	369	172.969	107	366	171.562	107	106.7	85.9029	2.8125	6
27099595	R	A	356	166.875	69	358	167.812	68	357	167.344	69	68.7	28.6343	0.9375	6
27885	R	A	349	163.594	106	350	164.062	106	349.5	163.828	106	106	14.3172	0.46875	6
27885	R	A	353	165.469	106	357	167.344	103	355	166.406	104	104.4	57.2686	1.875	6
27094378	R	V	350	164.062	111	357	167.344	109	353.5	165.703	112	110.9	100.22	3.28125	6
27099242	R	V	327	153.281	71	330	154.688	71	328.5	153.984	71	71	42.9515	1.40625	6
27099242	R	A	359	168.281	88	364	170.625	92	361.5	169.453	91	90.7	71.5858	2.34375	6
27099242	R	A	369	172.969	92	372	174.375	89	370.5	173.672	91.5	91	42.9515	1.40625	6
27099232	R	A	336	157.5	118	342	160.312	108	339	158.906	115	114	85.9029	2.8125	6
27092512	R	A	323	151.406	117	334	156.562	121	328.5	153.984	122	120.7	157.489	5.15625	6
27092512	R	V	339	158.906	116	348	163.125	102	343.5	161.016	109	109.2	128.854	4.21875	6
27099067	R	A	325	152.344	93	331	155.156	93	328	153.75	93	93	85.9029	2.8125	6
27099013	R	A	327	153.281	134	334	156.562	152	330.5	154.922	144.5	144	100.22	3.28125	6
27099013	R	A	335	157.031	153	341	159.844	138	338	158.438	147	146.4	85.9029	2.8125	6
8688	R	V	351	164.531	130	359	168.281	152	355	166.406	149	145.3	114.537	3.75	6
8688	R	A	363	170.156	142	369	172.969	126	366	171.562	134	134	85.9029	2.8125	6
4284	R	V	319	149.531	99	326	152.812	89	322.5	151.172	94	94	100.22	3.28125	6
4284	R	A	353	165.469	95	359	168.281	100	356	166.875	101	99.6	85.9029	2.8125	6
27099670	R	A	336	157.5	93	341	159.844	94	338.5	158.672	94	93.7	71.5858	2.34375	6
27099064	R	A	350	164.062	76	356	166.875	73	353	165.469	75	75	85.9029	2.8125	6
27098121	R	A	318	149.062	177	325	152.344	149	321.5	150.703	163.5	163.4	100.22	3.28125	6
27099118	R	A	360	168.75	111	364	170.625	111	362	169.688	112	111.2	57.2686	1.875	6
27094309	R	V	351	164.531	84	355	166.406	85	353	165.469	85	84.8	57.2686	1.875	6
20386	R	A	329	154.219	97	334	156.562	99	331.5	155.391	99	98.5	71.5858	2.34375	6
27099159	R	V	345	161.719	93	352	165	84	348.5	163.359	93.5	91.4	100.22	3.28125	6
27092360	R	A	332	155.625	121	338	158.438	126	335	157.031	123	123.1	85.9029	2.8125	6
27092360	R	V	352	165	142	359	168.281	151	355.5	166.641	148	147.5	100.22	3.28125	6
27092360	R	A	376	176.25	145	382	179.062	135	379	177.656	141	140.9	85.9029	2.8125	6
17692	R	V	320	150	72	326	152.812	71	323	151.406	74	72.7	85.9029	2.8125	6
17692	R	A	349	163.594	105	356	166.875	109	352.5	165.234	111.5	109.8	100.22	3.28125	6
27099231	R	V	343	160.781	138	349	163.594	146	346	162.188	143	142.7	85.9029	2.8125	6
27099231	R	A	357	167.344	131	364	170.625	108	360.5	168.984	117.5	118.4	100.22	3.28125	6
1924	R	A	342	160.312	89	348	163.125	82	345	161.719	86	85.6	85.9029	2.8125	6
2506	R	A	388	181.875	61	394	184.688	58	391	183.281	60	59.7	85.9029	2.8125	7
27095054	R	V	389	182.344	66	392	183.75	63	390.5	183.047	64.5	64.5	42.9515	1.40625	7
27099633	R	A	420	196.875	67	426	199.688	79	423	198.281	73	73	85.9029	2.8125	7
27098959	R	V	406	190.312	88	412	193.125	85	409	191.719	87	87	85.9029	2.8125	7
27099717	R	A	385	180.469	92	389	182.344	95	387	181.406	94	93.6	57.2686	1.875	7
26972	R	A	434	203.438	63	440	206.25	66	437	204.844	67	65.9	85.9029	2.8125	7
27095138	R	A	387	181.406	84	388	181.875	84	387.5	181.641	84	84	14.3172	0.46875	7
27099470	R	A	386	180.938	61	390	182.812	55	388	181.875	58	58.2	57.2686	1.875	7
27092116	L	A	60	28.125	94	65	30.4688	85	62.5	29.2969	90.5	90.2	71.5858	2.34375	1	0
28280	L	A	56	26.25	84	58	27.1875	84	57	26.7188	84	84	28.6343	0.9375	1
18850	L	V	47	22.0312	49	50	23.4375	51	48.5	22.7344	49.5	49.8	42.9515	1.40625	1
5029	L	A	52	24.375	68	53	24.8438	69	52.5	24.6094	68.5	68.5	14.3172	0.46875	1
27095453	L	A	54	25.3125	80	58	27.1875	81	56	26.25	81	80.8	57.2686	1.875	1
7632	L	A	55	25.7812	80	65	30.4688	77	60	28.125	84	81.5	143.172	4.6875	1
27099470	L	A	52	24.375	72	55	25.7812	71	53.5	25.0781	72	71.8	42.9515	1.40625	1
27094378	L	A	59	27.6562	80	63	29.5312	83	61	28.5938	82	81.6	57.2686	1.875	1
27092116	L	A	96	45	91	102	47.8125	98	99	46.4062	95	94.7	85.9029	2.8125	2	0
28242	L	V	100	46.875	86	104	48.75	87	102	47.8125	86	86.2	57.2686	1.875	2
27093474	L	A	69	32.3438	67	75	35.1562	72	72	33.75	69.5	69.5	85.9029	2.8125	2
2506	L	A	104	48.75	101	111	52.0312	107	107.5	50.3906	104.5	104.3	100.22	3.28125	2
2223	L	A	68	31.875	86	73	34.2188	95	70.5	33.0469	92	91.3	71.5858	2.34375	2
27616	L	A	67	31.4062	100	70	32.8125	97	68.5	32.1094	98.5	98.5	42.9515	1.40625	2
27616	L	V	104	48.75	104	109	51.0938	113	106.5	49.9219	108.5	108.5	71.5858	2.34375	2
27097837	L	A	76	35.625	97	81	37.9688	100	78.5	36.7969	99	98.8	71.5858	2.34375	2
27100224	L	A	78	36.5625	109	84	39.375	105	81	37.9688	105	106.3	85.9029	2.8125	2
27100224	L	V	120	56.25	166	128	60	172	124	58.125	169	169.1	114.537	3.75	2
27100206	L	V	96	45	79	103	48.2812	100	99.5	46.6406	88.5	89	100.22	3.28125	2
27100206	L	A	113	52.9688	114	118	55.3125	103	115.5	54.1406	110	109.2	71.5858	2.34375	2
27100058	L	A	90	42.1875	91	95	44.5312	95	92.5	43.3594	93	93	71.5858	2.34375	2
27095326	L	A	100	46.875	85	106	49.6875	93	103	48.2812	89	88.7	85.9029	2.8125	2
24307	L	V	107	50.1562	121	113	52.9688	129	110	51.5625	126	125.4	85.9029	2.8125	2
24307	L	A	116	54.375	131	125	58.5938	128	120.5	56.4844	131.5	130.6	128.854	4.21875	2
27092685	L	V	118	55.3125	118	124	58.125	124	121	56.7188	122	121.7	85.9029	2.8125	2
27095572	L	V	123	57.6562	118	128	60	124	125.5	58.8281	120.5	120.7	71.5858	2.34375	2
27098427	L	A	115	53.9062	76	122	57.1875	83	118.5	55.5469	79.5	79.5	100.22		2
27095353	L	A	115	53.9062	150	119	55.7812	160	117	54.8438	157	155.8	57.2686	1.875	2
27092739	L	A	85	39.8438	73	90	42.1875	79	87.5	41.0156	77	76.7	71.5858	2.34375	2
5029	L	A	93	43.5938	92	99	46.4062	96	96	45	94	94	85.9029	2.8125	2
27098959	L	A	71	33.2812	117	76	35.625	119	73.5	34.4531	120	119.2	71.5858	2.34375	2
27099717	L	A	72	33.75	86	76	35.625	85	74	34.6875	86	85.6	57.2686	1.875	2
26972	L	A	71	33.2812	100	78	36.5625	106	74.5	34.9219	104	103.6	100.22	3.28125	2
2523	L	V	90	42.1875	134	94	44.0625	136	92	43.125	135	135	57.2686	1.875	2
233	L	A	110	51.5625	114	118	55.3125	118	114	53.4375	118	116.9	114.537	3.75	2
27099362	L	A	104	48.75	93	110	51.5625	96	107	50.1562	95	95	85.9029	2.8125	2
27099339	L	A	120	56.25	122	125	58.5938	124	122.5	57.4219	123	123	71.5858	2.34375	2
27098057	L	A	119	55.7812	134	124	58.125	141	121.5	56.9531	138.5	138	71.5858	2.34375	2
27099620	L	A	121	56.7188	91	127	59.5312	98	124	58.125	95	94.9	85.9029	2.8125	2
27099638	L	A	89	41.7188	78	92	43.125	82	90.5	42.4219	80	80	42.9515	1.40625	2
27093728	L	A	70	32.8125	67	76	35.625	72	73	34.2188	69	69.1	85.9029	2.8125	2
27099242	L	A	112	52.5	100	118	55.3125	102	115	53.9062	102	101.4	85.9029	2.8125	2
27099232	L	A	72	33.75	94	77	36.0938	104	74.5	34.9219	102	100.7	71.5858	2.34375	2
27098826	L	A	66	30.9375	101	70	32.8125	102	68	31.875	103	102.2	57.2686	1.875	2
27099067	L	A	110	51.5625	167	114	53.4375	180	112	52.5	174	173.8	57.2686	1.875	2
8688	L	A	107	50.1562	105	115	53.9062	107	111	52.0312	105	105.7	114.537	3.75	2
4284	L	A	115	53.9062	102	122	57.1875	106	118.5	55.5469	104.5	104.3	100.22	3.28125	2
27099064	L	V	117	54.8438	113	123	57.6562	118	120	56.25	117	116.3	85.9029	2.8125	2
27099167	L	A	91	42.6562	79	96	45	80	93.5	43.8281	79.5	79.5	71.5858	2.34375	2
27098121	L	A	98	45.9375	106	104	48.75	108	101	47.3438	109	108.3	85.9029	2.8125	2
27099118	L	A	69	32.3438	78	73	34.2188	80	71	33.2812	79	79.2	57.2686	1.875	2
27094309	L	A	123	57.6562	140	131	61.4062	153	127	59.5312	151	149	114.537	3.75	2
27099159	L	A	107	50.1562	128	113	52.9688	124	110	51.5625	127	126.4	85.9029	2.8125	2
17692	L	A	75	35.1562	81	80	37.5	82	77.5	36.3281	82	81.7	71.5858	2.34375	2
27092116	L	A	149	69.8438	143	154	72.1875	150	151.5	71.0156	147	146.8	71.5858	2.34375	3	0
27092116	L	V	162	75.9375	160	172	80.625	158	167.5	78.5156	164	162.1	143.172	4.6875	3	1
28242	L	V	160	75	185	166	77.8125	206	163	76.4062	196	195.9	85.9029	2.8125	3
28242	L	A	172	80.625	217	178	83.4375	211	175	82.0312	216	215.1	85.9029	2.8125	3
27093474	L	V	125	58.5938	122	135	63.2812	134	130	60.9375	131	129.8	143.172	4.6875	3
27093474	L	A	168	78.75	148	173	81.0938	137	170.5	79.9219	143	142.8	71.5858	2.34375	3
27096056	L	A	187	87.6562	183	194	90.9375	176	190.5	89.2969	182.5	181.1	100.22	3.28125	3
2506	L	A	158	74.0625	158	173	81.0938	179	165.5	77.5781	173.5	171.6	214.757	7.03125	3
27099358	L	A	141	66.0938	108	147	68.9062	107	144	67.5	106	106.9	85.9029	2.8125	3
27099358	L	V	171	80.1562	169	182	85.3125	151	176.5	82.7344	164	162.6	157.489	5.15625	3
2223	L	A	149	69.8438	183	155	72.6562	195	152	71.25	187	188.1	85.9029	2.8125	3
2223	L	V	160	75	206	168	78.75	212	164	76.875	213	211.1	114.537	3.75	3
27099587	L	V	175	82.0312	208	186	87.1875	194	180.5	84.6094	203.5	202.4	157.489	5.15625	3
11571	L	A	135	63.2812	161	145	67.9688	169	140	65.625	167	166.3	143.172	4.6875	3
11571	L	V	174	81.5625	165	182	85.3125	156	178	83.4375	164	162.8	114.537	3.75	3
27092948	L	V	150	70.3125	140	155	72.6562	145	152.5	71.4844	142.5	142.7	71.5858	2.34375	3
27092948	L	A	183	85.7812	162	190	89.0625	165	186.5	87.4219	165	164.5	100.22	3.28125	3
28280	L	V	125	58.5938	166	134	62.8125	171	129.5	60.7031	170.5	169.4	128.854	4.21875	3
28280	L	A	156	73.125	188	161	75.4688	184	158.5	74.2969	186.5	186.3	71.5858	2.34375	3
27616	L	V	160	75	158	170	79.6875	161	165	77.3438	164	162.3	143.172	4.6875	3
27616	L	A	170	79.6875	161	176	82.5	149	173	81.0938	157	156.1	85.9029	2.8125	3
27097837	L	A	132	61.875	178	143	67.0312	218	137.5	64.4531	203	200.3	157.489	5.15625	3
27097837	L	V	153	71.7188	182	161	75.4688	166	157	73.5938	171	172	114.537	3.75	3
27100124	L	V	166	77.8125	147	171	80.1562	159	168.5	78.9844	153	153	71.5858	2.34375	3
27100124	L	A	180	84.375	182	190	89.0625	197	185	86.7188	193	191.7	143.172	4.6875	3
27100114	L	A	135	63.2812	146	142	66.5625	169	138.5	64.9219	157.5	157.5	100.22	3.28125	3
27100114	L	A	154	72.1875	198	160	75	205	157	73.5938	202	201.7	85.9029	2.8125	3
27100114	L	V	169	79.2188	199	175	82.0312	182	172	80.625	192	191.4	85.9029	2.8125	3
18850	L	A	151	70.7812	131	160	75	123	155.5	72.8906	129	128.2	128.854	4.21875	3
18850	L	V	178	83.4375	131	191	89.5312	122	184.5	86.4844	134	131.4	186.123	6.09375	3
27100224	L	A	132	61.875	175	139	65.1562	173	135.5	63.5156	175	174.4	100.22	3.28125	3
27095195	L	A	132	61.875	130	137	64.2188	134	134.5	63.0469	131	131.5	71.5858	2.34375	3
27095195	L	V	152	71.25	149	160	75	154	156	73.125	151	151.3	114.537	3.75	3
27095195	L	A	182	85.3125	137	188	88.125	132	185	86.7188	136	135.3	85.9029	2.8125	3
27100206	L	V	181	84.8438	214	188	88.125	204	184.5	86.4844	212.5	211.1	100.22	3.28125	3
27100058	L	V	174	81.5625	157	185	86.7188	138	179.5	84.1406	147	147.2	157.489	5.15625	3
21215	L	V	161	75.4688	137	170	79.6875	150	165.5	77.5781	94	145.6	128.854	4.21875	3
21215	L	A	178	83.4375	144	184	86.25	125	181	84.8438	138	136.4	85.9029	2.8125	3
27095326	L	V	142	66.5625	155	147	68.9062	160	144.5	67.7344	158.5	158.2	71.5858	2.34375	3
27095326	L	A	161	75.4688	176	167	78.2812	179	164	76.875	179	178.1	85.9029	2.8125	3
27095326	L	V	178	83.4375	159	191	89.5312	158	184.5	86.4844	160	159.4	186.123	6.09375	3
27095054	L	V	176	82.5	174	185	86.7188	176	180.5	84.6094	176	175.6	128.854	4.21875	3
24307	L	A	144	67.5	147	150	70.3125	156	147	68.9062	152	152.1	85.9029	2.8125	3
24307	L	V	169	79.2188	158	177	82.9688	151	173	81.0938	158	156.4	114.537	3.75	3
27100182	L	A	182	85.3125	189	189	88.5938	204	185.5	86.9531	199	197.9	100.22	3.28125	3
27097307	L	A	142	66.5625	145	151	70.7812	143	146.5	68.6719	149	147.1	128.854	4.21875	3
27099178	L	V	147	68.9062	187	153	71.7188	182	150	70.3125	187	185.7	85.9029	2.8125	3
27099178	L	A	164	76.875	171	171	80.1562	170	167.5	78.5156	174	172.6	100.22	3.28125	3
27092685	L	A	165	77.3438	142	172	80.625	152	168.5	78.9844	145.5	146.1	100.22	3.28125	3
27092685	L	A	185	86.7188	153	187	87.6562	153	186	87.1875	153	153	28.6343	0.9375	3
27093432	L	V	130	60.9375	126	134	62.8125	128	132	61.875	128	127.4	57.2686	1.875	3
27093432	L	V	152	71.25	145	159	74.5312	146	155.5	72.8906	147	146.3	100.22	3.28125	3
27097879	L	V	129	60.4688	134	138	64.6875	137	133.5	62.5781	136	135.9	128.854	4.21875	3
27097879	L	A	161	75.4688	156	169	79.2188	156	165	77.3438	159	157.9	114.537	3.75	3
27094531	L	A	128	60	86	132	61.875	85	130	60.9375	86	85.8	57.2686	1.875	3
27094531	L	V	174	81.5625	118	179	83.9062	129	176.5	82.7344	122.5	123	71.5858	2.34375	3
27094531	L	A	189	88.5938	158	192	90	162	190.5	89.2969	159.5	159.75	42.9515	1.40625	3
27093905	L	A	151	70.7812	154	160	75	165	155.5	72.8906	169.5	164.7	128.854	4.21875	3
27093905	L	V	160	75	165	167	78.2812	142	163.5	76.6406	157	154.9	100.22	3.28125	3
27095572	L	A	145	67.9688	130	152	71.25	130	148.5	69.6094	128.5	127.9	100.22	3.28125	3
27095572	L	V	185	86.7188	68	197	92.3438	66	191	89.5312	62	63.8	171.806	5.625	3
27098427	L	V	178	83.4375	166	189	88.5938	217	183.5	86.0156	188	190.7	157.489		3
27095974	L	V	163	76.4062	170	173	81.0938	164	168	78.75	171	169	143.172	4.6875	3
23271	L	A	182	85.3125	169	190	89.0625	182	186	87.1875	178	177.1	114.537	3.75	3
27095353	L	V	149	69.8438	192	159	74.5312	191	154	72.1875	193	192.7	143.172	4.6875	3
27095353	L	A	159	74.5312	191	168	78.75	181	163.5	76.6406	187.5	186.9	128.854	4.21875	3
27092739	L	V	142	66.5625	128	140	65.625	144	141	66.0938	134	136	-28.6343	-0.9375	3
27099967	L	A	133	62.3438	201	141	66.0938	191	137	64.2188	199	197.8	114.537	3.75	3
27099967	L	V	141	66.0938	191	148	69.375	165	144.5	67.7344	180	179.3	100.22	3.28125	3
12627	L	A	165	77.3438	178	172	80.625	157	168.5	78.9844	171.5	169.8	100.22	3.28125	3
12627	L	V	172	80.625	157	178	83.4375	130	175	82.0312	142	142.9	85.9029	2.8125	3
5029	L	A	159	74.5312	151	166	77.8125	133	162.5	76.1719	142	142.3	100.22	3.28125	3
5029	L	V	182	85.3125	141	192	90	132	187	87.6562	140	138.4	143.172	4.6875	3
27095453	L	A	139	65.1562	154	144	67.5	160	141.5	66.3281	158	157.3	71.5858	2.34375	3
27095453	L	A	169	79.2188	165	175	82.0312	157	172	80.625	163	162.1	85.9029	2.8125	3
27099906	L	A	184	86.25	185	191	89.5312	183	187.5	87.8906	186.5	185.6	100.22	3.28125	3
27099633	L	A	149	69.8438	178	156	73.125	159	152.5	71.4844	169.5	169	100.22	3.28125	3
27092341	L	V	159	74.5312	190	172	80.625	205	165.5	77.5781	200	199.3	186.123	6.09375	3
27092341	L	A	182	85.3125	203	190	89.0625	185	186	87.1875	198	195.9	114.537	3.75	3
27098959	L	V	156	73.125	185	164	76.875	174	160	75	181	180.4	114.537	3.75	3
27098959	L	A	181	84.8438	152	188	88.125	134	184.5	86.4844	143.5	143.5	100.22	3.28125	3
27098782	L	A	132	61.875	137	135	63.2812	150	133.5	62.5781	144	143.8	42.9515	1.40625	3
27098782	L	V	143	67.0312	166	151	70.7812	171	147	68.9062	170	169.6	114.537	3.75	3
27098782	L	A	152	71.25	170	157	73.5938	166	154.5	72.4219	168.5	168.3	71.5858	2.34375	3
27098782	L	V	175	82.0312	132	181	84.8438	115	178	83.4375	123	123.3	85.9029	2.8125	3
27099717	L	V	158	74.0625	184	169	79.2188	194	163.5	76.6406	192.5	191.2	157.489	5.15625	3
27099717	L	A	182	85.3125	187	192	90	164	187	87.6562	179	177.5	143.172	4.6875	3
26972	L	A	169	79.2188	167	177	82.9688	192	173	81.0938	180	179.8	114.537	3.75	3
26972	L	V	183	85.7812	197	195	91.4062	158	189	88.5938	184	181.3	171.806	5.625	3
2523	L	A	130	60.9375	183	143	67.0312	174	136.5	63.9844	181.5	180.4	186.123	6.09375	3
2523	L	V	156	73.125	158	167	78.2812	139	161.5	75.7031	151	150	157.489	5.15625	3
233	L	A	153	71.7188	187	161	75.4688	193	157	73.5938	192	191.4	114.537	3.75	3
233	L	V	170	79.6875	185	178	83.4375	166	174	81.5625	177	176.2	114.537	3.75	3
7632	L	A	161	75.4688	161	168	78.75	175	164.5	77.1094	168	168	100.22	3.28125	3
7632	L	V	170	79.6875	178	178	83.4375	179	174	81.5625	182	180.4	114.537	3.75	3
27095138	L	A	179	83.9062	157	192	90	163	185.5	86.9531	161.5	161.1	186.123	6.09375	3
27099362	L	V	184	86.25	180	192	90	186	188	88.125	185	184.3	114.537	3.75	3
28170	L	V	182	85.3125	201	192	90	187	187	87.6562	204	199.6	143.172	4.6875	3
27099339	L	V	141	66.0938	160	148	69.375	166	144.5	67.7344	163.5	163.4	100.22	3.28125	3
27099339	L	A	161	75.4688	173	167	78.2812	167	164	76.875	171	170.6	85.9029	2.8125	3
27490	L	A	135	63.2812	210	143	67.0312	209	139	65.1562	212	211	114.537	3.75	3
27490	L	V	146	68.4375	204	154	72.1875	188	150	70.3125	197	196.8	114.537	3.75	3
27099530	L	A	155	72.6562	122	162	75.9375	122	158.5	74.2969	122.5	122.4	100.22	3.28125	3
27099530	L	A	182	85.3125	191	190	89.0625	203	186	87.1875	200	198.9	114.537	3.75	3
27098057	L	A	163	76.4062	199	171	80.1562	193	167	78.2812	197	196.6	114.537	3.75	3
27098057	L	V	186	87.1875	191	196	91.875	159	191	89.5312	176	175.5	143.172	4.6875	3
27099412	L	A	159	74.5312	168	168	78.75	156	163.5	76.6406	162.5	162.3	128.854	4.21875	3
27099412	L	V	179	83.9062	158	189	88.5938	159	184	86.25	159	158.8	143.172	4.6875	3
27100031	L	A	162	75.9375	176	172	80.625	192	167	78.2812	188	186.5	143.172	4.6875	3
27100031	L	V	182	85.3125	175	190	89.0625	160	186	87.1875	168	167.6	114.537	3.75	3
27099573	L	V	143	67.0312	163	151	70.7812	168	147	68.9062	167	166.3	114.537	3.75	3
27099573	L	A	174	81.5625	177	182	85.3125	166	178	83.4375	173	172.4	114.537	3.75	3
27096794	L	A	129	60.4688	121	135	63.2812	124	132	61.875	125	124	85.9029	2.8125	3
27096794	L	A	162	75.9375	137	171	80.1562	135	166.5	78.0469	136.5	136.3	128.854	4.21875	3
27099620	L	V	164	76.875	174	176	82.5	146	170	79.6875	161	160.5	171.806	5.625	3
27099662	L	V	163	76.4062	166	169	79.2188	170	166	77.8125	168	168.1	85.9029	2.8125	3
27099662	L	A	185	86.7188	176	193	90.4688	179	189	88.5938	177	177.4	114.537	3.75	3
27096821	L	A	171	80.1562	199	182	85.3125	203	176.5	82.7344	202.5	202.2	157.489	5.15625	3
27096821	L	V	177	82.9688	203	192	90	181	184.5	86.4844	200.5	197.2	214.757	7.03125	3
27095413	L	V	140	65.625	103	146	68.4375	110	143	67.0312	108	107.3	85.9029	2.8125	3
27095413	L	A	189	88.5938	152	194	90.9375	157	191.5	89.7656	154.5	154.5	71.5858	2.34375	3
27093371	L	V	136	63.75	129	141	66.0938	135	138.5	64.9219	133.5	132.7	71.5858	2.34375	3
27092999	L	V	173	81.0938	128	176	82.5	136	174.5	81.7969	131	131.8	42.9515	1.40625	3
27092999	L	V	177	82.9688	139	188	88.125	152	182.5	85.5469	153	149.8	157.489	5.15625	3
1627	L	A	158	74.0625	144	168	78.75	151	163	76.4062	149	148.5	143.172	4.6875	3
1627	L	V	182	85.3125	115	191	89.5312	192	186.5	87.4219	104	103.5	128.854	4.21875	3
27093728	L	V	173	81.0938	133	182	85.3125	151	177.5	83.2031	150	146.4	128.854	4.21875	3
27099470	L	A	186	87.1875	162	192	90	173	189	88.5938	169	168.4	85.9029	2.8125	3
27099572	L	A	152	71.25	176	162	75.9375	192	157	73.5938	188	186.3	143.172	4.6875	3
27099572	L	V	172	80.625	171	180	84.375	139	176	82.5	155	155	114.537	3.75	3
27099595	L	V	174	81.5625	178	184	86.25	171	179	83.9062	177	175.9	143.172	4.6875	3
27099595	L	A	184	86.25	171	191	89.5312	154	187.5	87.8906	164.5	163.8	100.22	3.28125	3
27885	L	A	169	79.2188	152	179	83.9062	157	174	81.5625	156	155.2	143.172	4.6875	3
27099609	L	A	149	69.8438	145	159	74.5312	157	154	72.1875	154	152.8	143.172	4.6875	3
27094378	L	A	164	76.875	172	172	80.625	173	168	78.75	173	172.9	114.537	3.75	3
27094378	L	V	185	86.7188	176	195	91.4062	155	190	89.0625	169	167.5	143.172	4.6875	3
27099242	L	V	130	60.9375	121	137	64.2188	128	133.5	62.5781	126.5	125.8	100.22	3.28125	3
27099242	L	A	175	82.0312	145	182	85.3125	144	178.5	83.6719	146	145.4	100.22	3.28125	3
27099232	L	V	185	86.7188	168	192	90	160	188.5	88.3594	165.5	164.8	100.22	3.28125	3
27098826	L	A	153	71.7188	175	162	75.9375	177	157.5	73.8281	179	177.7	128.854	4.21875	3
27098826	L	V	176	82.5	168	188	88.125	144	182	85.3125	162	159.5	171.806	5.625	3
27099067	L	V	127	59.5312	196	136	63.75	203	131.5	61.6406	201.5	200.5	128.854	4.21875	3
27099067	L	A	159	74.5312	175	167	78.2812	129	163	76.4062	151	151.6	114.537	3.75	3
27099067	L	V	170	79.6875	121	177	82.9688	124	173.5	81.3281	121.5	122.1	100.22	3.28125	3
27099013	L	A	128	60	142	136	63.75	146	132	61.875	146	145.2	114.537	3.75	3
27099013	L	V	162	75.9375	178	172	80.625	175	167	78.2812	182	179.8	143.172	4.6875	3
27099013	L	A	179	83.9062	155	184	86.25	134	181.5	85.0781	145	144.7	71.5858	2.34375	3
27099147	L	A	143	67.0312	211	153	71.7188	206	148	69.375	217	213.6	143.172	4.6875	3
8688	L	A	185	86.7188	165	190	89.0625	179	187.5	87.8906	173	172.5	71.5858	2.34375	3
4284	L	V	158	74.0625	151	165	77.3438	168	161.5	75.7031	160.5	160.1	100.22	3.28125	3
4284	L	V	186	87.1875	151	192	90	142	189	88.5938	146	146.3	85.9029	2.8125	3
27099670	L	A	164	76.875	116	172	80.625	140	168	78.75	124	125.6	114.537	3.75	3
27099064	L	A	150	70.3125	149	158	74.0625	132	154	72.1875	143	142	114.537	3.75	3
27099064	L	V	176	82.5	131	186	87.1875	130	181	84.8438	134	132.7	143.172	4.6875	3
27099167	L	V	135	63.2812	111	145	67.9688	102	140	65.625	113	110.8	143.172	4.6875	3
27098121	L	A	179	83.9062	219	187	87.6562	232	183	85.7812	228	227.1	114.537	3.75	3
27094309	L	V	164	76.875	110	172	80.625	104	168	78.75	111	109.3	114.537	3.75	3
20386	L	A	159	74.5312	207	168	78.75	215	163.5	76.6406	221.5	217.3	128.854	4.21875	3
20386	L	V	172	80.625	197	181	84.8438	155	176.5	82.7344	174	174.7	128.854	4.21875	3
27099159	L	V	133	62.3438	150	142	66.5625	156	137.5	64.4531	156.5	155	128.854	4.21875	3
27099159	L	A	166	77.8125	172	172	80.625	160	169	79.2188	167	166.4	85.9029	2.8125	3
27099159	L	V	174	81.5625	155	180	84.375	139	177	82.9688	147	146.9	85.9029	2.8125	3
27092360	L	A	184	86.25	184	195	91.4062	196	189.5	88.8281	193	191.5	157.489	5.15625	3
17692	L	A	133	62.3438	137	142	66.5625	142	137.5	64.4531	142.5	141.3	128.854	4.21875	3
17692	L	V	162	75.9375	133	172	80.625	151	167	78.2812	144	143.1	143.172	4.6875	3
17692	L	A	179	83.9062	139	185	86.7188	108	182	85.3125	124	124	85.9029	2.8125	3
27099231	L	A	168	78.75	162	173	81.0938	192	170.5	79.9219	179	178.2	71.5858	2.34375	3
27099231	L	V	181	84.8438	178	189	88.5938	159	185	86.7188	167	167.7	114.537	3.75	3
1924	L	A	178	83.4375	148	186	87.1875	146	182	85.3125	148	147.3	114.537	3.75	3
1924	L	V	185	86.7188	146	193	90.4688	129	189	88.5938	141	139.4	114.537	3.75	3
27099236	L	A	152	71.25	182	161	75.4688	188	156.5	73.3594	187.5	186.4	128.854	4.21875	3
27099236	L	V	170	79.6875	184	179	83.9062	149	174.5	81.7969	171	169.1	128.854	4.21875	3
27092116	L	A	196	91.875	135	205	96.0938	142	200.5	93.9844	138.5	138.4	128.854	4.21875	4	1
27092116	L	V	246	115.312	122	249	116.719	125	247.5	116.016	123.5	123,5	42.9515	1.40625	4	0
27096056	L	V	232	108.75	185	243	113.906	187	237.5	111.328	184	184.7	157.489	5.15625	4
27096056	L	V	244	114.375	188	252	118.125	188	248	116.25	188	188	114.537	3.75	4
2506	L	V	188	88.125	183	197	92.3438	173	192.5	90.2344	180.5	179.6	128.854	4.21875	4
27099358	L	A	201	94.2188	135	213	99.8438	135	207	97.0312	136	135.5	171.806	5.625	4
2223	L	V	252	118.125	109	257	120.469	115	254.5	119.297	112.5	112.3	71.5858	2.34375	4
27099587	L	A	193	90.4688	175	201	94.2188	145	197	92.3438	160	160	114.537	3.75	4
27099587	L	V	205	96.0938	131	210	98.4375	119	207.5	97.2656	124.5	124.7	71.5858	2.34375	4
27092948	L	V	211	98.9062	136	218	102.188	125	214.5	100.547	132	131.3	100.22	3.28125	4
27092948	L	A	249	116.719	157	257	120.469	163	253	118.594	163	161.2	114.537	3.75	4
28280	L	V	233	109.219	108	241	112.969	117	237	111.094	113	113.1	114.537	3.75	4
27100124	L	V	191	89.5312	197	203	95.1562	169	197	92.3438	191	187.6	171.806	5.625	4
27100114	L	A	253	118.594	122	258	120.938	120	255.5	119.766	122	121.5	71.5858	2.34375	4
27100224	L	V	212	99.375	123	220	103.125	116	216	101.25	121	120.3	114.537	3.75	4
27100224	L	V	229	107.344	106	236	110.625	104	232.5	108.984	106	105.5	100.22	3.28125	4
27095195	L	V	222	104.062	86	227	106.406	87	224.5	105.234	87	86.8	71.5858	2.34375	4
27100206	L	A	206	96.5625	151	212	99.375	127	209	97.9688	139	138.7	85.9029	2.8125	4
27100058	L	A	195	91.4062	146	203	95.1562	144	199	93.2812	150	147.7	114.537	3.75	4
21215	L	A	218	102.188	101	226	105.938	108	222	104.062	104	104.1	114.537	3.75	4
21215	L	A	252	118.125	137	259	121.406	140	255.5	119.766	140.5	139.5	100.22	3.28125	4
27095054	L	V	208	97.5	161	220	103.125	127	214	100.312	155	150.4	171.806	5.625	4
24307	L	A	220	103.125	101	226	105.938	102	223	104.531	105	103.4	85.9029	2.8125	4
24307	L	V	250	117.188	103	254	119.062	101	252	118.125	103	102.4	57.2686	1.875	4
27100182	L	V	201	94.2188	175	212	99.375	139	206.5	96.7969	157	156.8	157.489	5.15625	4
27097307	L	V	208	97.5	102	217	101.719	91	212.5	99.6094	101.5	99.2	128.854	4.21875	4
27092685	L	A	192	90	150	196	91.875	138	194	90.9375	145	144.4	57.2686	1.875	4
27092685	L	V	245	114.844	90	251	117.656	99	248	116.25	96	95.6	85.9029	2.8125	4
27093432	L	V	212	99.375	151	221	103.594	148	216.5	101.484	152	150.9	128.854	4.21875	4
27097879	L	V	193	90.4688	136	211	98.9062	130	202	94.6875	144	139.7	257.709	8.4375	4
27094531	L	V	207	97.0312	189	217	101.719	162	212	99.375	182	179.8	143.172	4.6875	4
27094531	L	A	227	106.406	133	231	108.281	131	229	107.344	132	132.2	57.2686	1.875	4
27093905	L	V	209	97.9688	131	215	100.781	130	212	99.375	134	132.3	85.9029	2.8125	4
27098427	L	A	194	90.9375	215	201	94.2188	187	197.5	92.5781	203	201.6	100.22		4
27098427	L	V	230	107.812	152	237	111.094	146	233.5	109.453	150.5	149.9	100.22		4
27095974	L	A	193	90.4688	139	200	93.75	122	196.5	92.1094	132.5	131.5	100.22	3.28125	4
23271	L	V	195	91.4062	181	205	96.0938	158	200	93.75	173	171.5	143.172	4.6875	4
27095353	L	A	241	112.969	109	245	114.844	103	243	113.906	107	106.4	57.2686	1.875	4
27092739	L	V	195	91.4062	184	205	96.0938	163	200	93.75	177		143.172	4.6875	4
27092739	L	A	205	96.0938	163	210	98.4375	138	207.5	97.2656	151.5	175.8	71.5858	2.34375	4
5029	L	A	244	114.375	118	252	118.125	115	248	116.25	116	116.3	114.537	3.75	4
27095453	L	V	198	92.8125	133	209	97.9688	116	203.5	95.3906	129.5	127.2	157.489	5.15625	4
27095453	L	V	234	109.688	135	241	112.969	153	237.5	111.328	145	144.5	100.22	3.28125	4
27095453	L	A	241	112.969	153	248	116.25	159	244.5	114.609	157.5	156.8	100.22	3.28125	4
27099906	L	V	195	91.4062	180	203	95.1562	178	199	93.2812	182	180.6	114.537	3.75	4
27099906	L	A	222	104.062	121	225	105.469	114	223.5	104.766	117	117.3	42.9515	1.40625	4
27099906	L	A	248	116.25	108	250	117.188	110	249	116.719	109	109	28.6343	0.9375	4
27099633	L	V	218	102.188	109	227	106.406	106	222.5	104.297	113	110.7	128.854	4.21875	4
27098959	L	V	214	100.312	111	218	102.188	111	216	101.25	112	111.6	57.2686	1.875	4
27098782	L	V	201	94.2188	96	206	96.5625	101	203.5	95.3906	98.5	98.5	71.5858	2.34375	4
27099717	L	V	205	96.0938	134	214	100.312	108	209.5	98.2031	123.5	122.4	128.854	4.21875	4
2523	L	A	222	104.062	107	226	105.938	109	224	105	108	108.2	57.2686	1.875	4
2523	L	A	250	117.188	139	256	120	143	253	118.594	143	141.9	85.9029	2.8125	4
7632	L	V	212	99.375	137	222	104.062	136	217	101.719	139	138.4	143.172	4.6875	4
27095138	L	V	211	98.9062	165	223	104.531	150	217	101.719	165	162.1	171.806	5.625	4
27099362	L	A	204	95.625	163	212	99.375	143	208	97.5	154	153.6	114.537	3.75	4
27099362	L	V	242	113.438	130	249	116.719	120	245.5	115.078	127	126.4	100.22	3.28125	4
28170	L	A	193	90.4688	183	199	93.2812	174	196	91.875	174	176	85.9029	2.8125	4
27490	L	A	223	104.531	74	228	106.875	75	225.5	105.703	75	74.7	71.5858	2.34375	4
27099530	L	V	190	89.0625	203	201	94.2188	177	195.5	91.6406	195	193	157.489	5.15625	4
27099530	L	A	239	112.031	123	246	115.312	131	242.5	113.672	127.5	127.3	100.22	3.28125	4
27099573	L	V	222	104.062	122	228	106.875	124	225	105.469	124	123.4	85.9029	2.8125	4
27099573	L	A	240	112.5	130	249	116.719	156	244.5	114.609	142.5	142.6	128.854	4.21875	4
27099573	L	A	253	118.594	165	257	120.469	166	255	119.531	167	166.2	57.2686	1.875	4
27096794	L	V	209	97.9688	155	217	101.719	129	213	99.8438	145	143.7	114.537	3.75	4
27099620	L	A	202	94.6875	156	209	97.9688	158	205.5	96.3281	157	157	100.22	3.28125	4
27099620	L	V	212	99.375	159	219	102.656	144	215.5	101.016	156	154.1	100.22	3.28125	4
27099638	L	V	201	94.2188	211	210	98.4375	201	205.5	96.3281	211.5	209.3	128.854	4.21875	4
27099638	L	A	213	99.8438	192	220	103.125	170	216.5	101.484	181.5	181.3	100.22	3.28125	4
27099638	L	V	245	114.844	132	251	117.656	140	248	116.25	136	136.3	85.9029	2.8125	4
27099662	L	V	203	95.1562	182	212	99.375	176	207.5	97.2656	181.5	180.3	128.854	4.21875	4
27099662	L	A	253	118.594	154	256	120	155	254.5	119.297	154.5	154.3	42.9515	1.40625	4
27095413	L	V	204	95.625	168	217	101.719	166	210.5	98.6719	168	167.6	186.123	6.09375	4
27093371	L	A	192	90	176	201	94.2188	154	196.5	92.1094	169	167.4	128.854	4.21875	4
27093371	L	A	247	115.781	145	253	118.594	155	250	117.188	152	150.9	85.9029	2.8125	4
27092999	L	A	193	90.4688	131	201	94.2188	112	197	92.3438	124	122.2	114.537	3.75	4
27093728	L	A	209	97.9688	96	215	100.781	97	212	99.375	96	96.1	85.9029	2.8125	4
27099470	L	V	209	97.9688	187	219	102.656	171	214	100.312	186	183	143.172	4.6875	4
27099572	L	V	227	106.406	102	233	109.219	97	230	107.812	102	100.9	85.9029	2.8125	4
27885	L	V	191	89.5312	151	204	95.625	132	197.5	92.5781	147.5	145.2	186.123	6.09375	4
27885	L	A	248	116.25	88	255	119.531	91	251.5	117.891	91	90.4	100.22	3.28125	4
27099609	L	V	203	95.1562	138	214	100.312	230	208.5	97.7344	135	134.6	157.489	5.15625	4
27099242	L	V	194	90.9375	147	204	95.625	154	199	93.2812	155	153.2	143.172	4.6875	4
27099242	L	A	248	116.25	115	254	119.062	126	251	117.656	122	121.1	85.9029	2.8125	4
27099232	L	A	192	90	160	199	93.2812	143	195.5	91.6406	152.5	152.1	100.22	3.28125	4
27099232	L	V	223	104.531	126	231	108.281	124	227	106.406	127	126.1	114.537	3.75	4
27092512	L	A	190	89.0625	157	199	93.2812	167	194.5	91.1719	164	163	128.854	4.21875	4
27092512	L	V	211	98.9062	180	219	102.656	183	215	100.781	188	185.3	114.537	3.75	4
27098826	L	V	216	101.25	122	223	104.531	130	219.5	102.891	127.5	127	100.22	3.28125	4
27098826	L	A	238	111.562	143	243	113.906	148	240.5	112.734	146.5	145.8	71.5858	2.34375	4
27099147	L	V	198	92.8125	123	214	100.312	103	206	96.5625	122	118.4	229.074	7.5	4
27099147	L	V	241	112.969	116	248	116.25	112	244.5	114.609	115.5	114.9	100.22	3.28125	4
8688	L	V	205	96.0938	173	215	100.781	163	210	98.4375	169	168.7	143.172	4.6875	4
4284	L	A	201	94.2188	139	208	97.5	138	204.5	95.8594	140	139.5	100.22	3.28125	4
4284	L	V	241	112.969	110	248	116.25	115	244.5	114.609	114	113.4	100.22	3.28125	4
27099670	L	V	189	88.5938	189	200	93.75	161	194.5	91.1719	177.5	176.5	157.489	5.15625	4
27099670	L	A	245	114.844	107	248	116.25	113	246.5	115.547	110	110	42.9515	1.40625	4
27099064	L	V	248	116.25	129	256	120	136	252	118.125	135	134	114.537	3.75	4
27099167	L	A	198	92.8125	138	206	96.5625	142	202	94.6875	142	141.4	114.537	3.75	4
27098121	L	V	190	89.0625	231	200	93.75	199	195	91.4062	220	218.2	143.172	4.6875	4
27099118	L	V	196	91.875	134	201	94.2188	133	198.5	93.0469	134	133.8	71.5858	2.34375	4
27099118	L	V	217	101.719	166	225	105.469	157	221	103.594	165	163.4	114.537	3.75	4
27099118	L	A	236	110.625	143	242	113.438	133	239	112.031	139	138.6	85.9029	2.8125	4
27099159	L	A	214	100.312	105	219	102.656	116	216.5	101.484	111.5	111.2	71.5858	2.34375	4
27092360	L	V	204	95.625	183	215	100.781	151	209.5	98.2031	170.5	169	157.489	5.15625	4
17692	L	V	236	110.625	70	241	112.969	61	238.5	111.797	67	66.3	71.5858	2.34375	4
1924	L	V	242	113.438	134	247	115.781	129	244.5	114.609	132.5	132.2	71.5858	2.34375	4
27092116	L	A	282	132.188	114	288	135	114	285	133.594	115	114.7	85.9029	2.8125	5	0
28242	L	V	265	124.219	133	268	125.625	139	266.5	124.922	136	136	42.9515	1.40625	5
28242	L	A	287	134.531	152	292	136.875	148	289.5	135.703	151	150.7	71.5858	2.34375	5
27093474	L	V	252	118.125	113	260	121.875	107	256	120	111	110.3	114.537	3.75	5
27096056	L	A	258	120.938	184	264	123.75	169	261	122.344	178	177	85.9029	2.8125	5
2506	L	A	282	132.188	139	286	134.062	136	284	133.125	138	138	57.2686	1.875	5
27099358	L	A	272	127.5	136	279	130.781	132	275.5	129.141	135.5	143.8	100.22	3.28125	5
27099358	L	A	294	137.812	135	301	141.094	136	297.5	139.453	138.5	137.4	100.22	3.28125	5
2223	L	A	283	132.656	149	289	135.469	150	286	134.062	150	149.7	85.9029	2.8125	5
27099587	L	A	255	119.531	166	262	122.812	162	258.5	121.172	167.5	166	100.22	3.28125	5
27099587	L	V	284	133.125	117	291	136.406	119	287.5	134.766	119	118.6	100.22	3.28125	5
11571	L	A	264	123.75	122	268	125.625	121	266	124.688	123	122	57.2686	1.875	5
11571	L	V	303	142.031	99	310	145.312	94	306.5	143.672	98	97.5	100.22	3.28125	5
11571	L	A	318	149.062	79	319	149.531	77	318.5	149.297	78	78	14.3172	0.46875	5
27092948	L	V	291	136.406	122	296	138.75	121	293.5	137.578	122.5	122.2	71.5858	2.34375	5
27092948	L	A	314	147.188	125	317	148.594	119	315.5	147.891	122	122	42.9515	1.40625	5
28280	L	A	272	127.5	158	276	129.375	162	274	128.438	160	160	57.2686	1.875	5
27616	L	V	293	137.344	121	298	139.688	132	295.5	138.516	127	126.8	71.5858	2.34375	5
27097837	L	A	264	123.75	117	271	127.031	108	267.5	125.391	114.5	113.6	100.22	3.28125	5
27097837	L	V	305	142.969	109	314	147.188	96	309.5	145.078	104	103.3	128.854	4.21875	5
27100124	L	A	272	127.5	118	278	130.312	138	275	128.906	129	128.3	85.9029	2.8125	5
27100124	L	V	284	133.125	140	291	136.406	125	287.5	134.766	131	132.75	100.22	3.28125	5
27100114	L	V	280	131.25	158	287	134.531	152	283.5	132.891	159.5	157.5	100.22	3.28125	5
18850	L	A	256	120	108	261	122.344	115	258.5	121.172	111.5	111.3	71.5858	2.34375	5
18850	L	V	266	124.688	119	275	128.906	112	270.5	126.797	116.5	115.9	128.854	4.21875	5
27100224	L	V	255	119.531	94	264	123.75	77	259.5	121.641	88	87	128.854	4.21875	5
27095195	L	A	265	124.219	109	269	126.094	119	267	125.156	114	114	57.2686	1.875	5
27100206	L	V	263	123.281	163	272	127.5	164	267.5	125.391	164	163.9	128.854	4.21875	5
27100206	L	A	275	128.906	165	283	132.656	145	279	130.781	161	158.6	114.537	3.75	5
27100058	L	A	281	131.719	117	288	135	112	284.5	133.359	115.5	115.25	100.22	3.28125	5
27100058	L	A	301	141.094	152	307	143.906	141	304	142.5	151	149.1	85.9029	2.8125	5
21215	L	V	276	129.375	119	281	131.719	113	278.5	130.547	116.5	116.2	71.5858	2.34375	5
27095326	L	A	264	123.75	117	270	126.562	128	267	125.156	123	123	85.9029	2.8125	5
27095326	L	V	284	133.125	154	295	138.281	138	289.5	135.703	155.5	152.1	157.489	5.15625	5
27095054	L	A	276	129.375	150	283	132.656	148	279.5	131.016	148.5	148.6	100.22	3.28125	5
27095054	L	V	300	140.625	139	308	144.375	133	304	142.5	136	136.1	114.537	3.75	5
24307	L	A	287	134.531	105	294	137.812	107	290.5	136.172	108	107.1	100.22	3.28125	5
24307	L	A	303	142.031	88	310	145.312	69	306.5	143.672	77.5	78.1	100.22	3.28125	5
27100182	L	A	273	127.969	128	278	130.312	138	275.5	129.141	134	133.5	71.5858	2.34375	5
27100182	L	V	295	138.281	132	302	141.562	158	298.5	139.922	145	144.9	100.22	3.28125	5
27100182	L	V	310	145.312	176	315	147.656	182	312.5	146.484	179.5	179.2	71.5858	2.34375	5
27100182	L	A	315	147.656	182	323	151.406	178	319	149.531	183	181.8	114.537	3.75	5
27097307	L	A	273	127.969	104	275	128.906	113	274	128.438	108	108.4	28.6343	0.9375	5
27097307	L	A	291	136.406	124	296	138.75	129	293.5	137.578	126.5	126.5	71.5858	2.34375	5
27097307	L	V	304	142.5	135	309	144.844	130	306.5	143.672	134.5	133.5	71.5858	2.34375	5
27099178	L	V	276	129.375	128	282	132.188	121	279	130.781	128	126.4	85.9029	2.8125	5
27099178	L	A	317	148.594	104	322	150.938	103	319.5	149.766	106	105	71.5858	2.34375	5
27092685	L	V	280	131.25	112	290	135.938	97	285	133.594	108	106.5	143.172	4.6875	5
27093432	L	A	278	130.312	132	285	133.594	104	281.5	131.953	120	118.8	100.22	3.28125	5
27097879	L	A	274	128.438	115	277	129.844	113	275.5	129.141	114.5	114.3	42.9515	1.40625	5
27094531	L	A	277	129.844	162	281	131.719	153	279	130.781	159	158.2	57.2686	1.875	5
27093905	L	A	288	135	161	293	137.344	166	290.5	136.172	164.5	163.8	71.5858	2.34375	5
27093905	L	A	293	137.344	166	299	140.156	157	296	138.75	163	162.1	85.9029	2.8125	5
27093905	L	V	300	140.625	154	308	144.375	133	304	142.5	142	143	114.537	3.75	5
27095572	L	V	295	138.281	67	299	140.156	71	297	139.219	69	69	57.2686	1.875	5
27095572	L	A	307	143.906	84	312	146.25	88	309.5	145.078	86.5	86.3	71.5858	2.34375	5
27098427	L	A	279	130.781	69	285	133.594	60	282	132.188	67	65.6	85.9029		5
27095974	L	V	286	134.062	173	294	137.812	176	290	135.938	176	175.3	114.537	3.75	5
27095974	L	A	295	138.281	175	300	140.625	165	297.5	139.453	172	171	71.5858	2.34375	5
23271	L	V	277	129.844	96	285	133.594	122	281	131.719	111	110.4	114.537	3.75	5
23271	L	A	308	144.375	115	313	146.719	110	310.5	145.547	112.5	112.5	71.5858	2.34375	5
27095353	L	A	280	131.25	132	286	134.062	136	283	132.656	136	135.4	85.9029	2.8125	5
27095353	L	V	305	142.969	129	310	145.312	148	307.5	144.141	137	139.1	71.5858	2.34375	5
27092739	L	A	289	135.469	141	293	137.344	137	291	136.406	140	139.6	57.2686	1.875	5
27099967	L	V	264	123.75	99	272	127.5	107	268	125.625	103	103	114.537	3.75	5
27099967	L	A	277	129.844	111	282	132.188	112	279.5	131.016	112	111.8	71.5858	2.34375	5
27099967	L	V	287	134.531	105	293	137.344	95	290	135.938	100	100	85.9029	2.8125	5
12627	L	V	274	128.438	103	279	130.781	111	276.5	129.609	107.5	107.2	71.5858	2.34375	5
12627	L	A	290	135.938	108	295	138.281	102	292.5	137.109	104.5	104.8	71.5858	2.34375	5
5029	L	V	288	135	111	293	137.344	105	290.5	136.172	107.5	107.8	71.5858	2.34375	5
5029	L	V	309	144.844	109	313	146.719	101	311	145.781	106	105.6	57.2686	1.875	5
27095453	L	A	265	124.219	153	273	127.969	159	269	126.094	157	156.4	114.537	3.75	5
27099906	L	A	280	131.25	128	285	133.594	118	282.5	132.422	124	123.5	71.5858	2.34375	5
27099633	L	A	253	118.594	110	260	121.875	118	256.5	120.234	115.5	114.9	100.22	3.28125	5
27092341	L	V	256	120	92	264	123.75	102	260	121.875	99	98.4	114.537	3.75	5
27092341	L	A	298	139.688	140	306	143.438	139	302	141.562	140	139.9	114.537	3.75	5
27098959	L	A	268	125.625	122	272	127.5	126	270	126.562	125	124.6	57.2686	1.875	5
27098959	L	V	282	132.188	122	288	135	113	285	133.594	119	118.3	85.9029	2.8125	5
27098782	L	A	262	122.812	106	270	126.562	117	266	124.688	115	113.7	114.537	3.75	5
27098782	L	V	295	138.281	92	302	141.562	94	298.5	139.922	94	93.4	100.22	3.28125	5
27099717	L	A	281	131.719	121	286	134.062	124	283.5	132.891	122.5	122.5	71.5858	2.34375	5
27099717	L	V	296	138.75	139	304	142.5	137	300	140.625	141	139.7	114.537	3.75	5
2523	L	V	286	134.062	122	291	136.406	121	288.5	135.234	122	121.8	71.5858	2.34375	5
233	L	A	268	125.625	160	275	128.906	177	271.5	127.266	171	169.9	100.22	3.28125	5
233	L	V	290	135.938	161	299	140.156	145	294.5	138.047	154.5	154.1	128.854	4.21875	5
7632	L	A	278	130.312	163	285	133.594	156	281.5	131.953	160.5	160.3	100.22	3.28125	5
27095138	L	A	266	124.688	141	274	128.438	145	270	126.562	145	144.1	114.537	3.75	5
27099362	L	A	280	131.25	164	287	134.531	171	283.5	132.891	170.5	169.1	100.22	3.28125	5
27099362	L	V	290	135.938	168	297	139.219	149	293.5	137.578	160.5	159.6	100.22	3.28125	5
28170	L	A	271	127.031	160	278	130.312	189	274.5	128.672	179.5	177.5	100.22	3.28125	5
28170	L	V	286	134.062	175	295	138.281	162	290.5	136.172	160	169.4	128.854	4.21875	5
27099339	L	A	268	125.625	118	273	127.969	120	270.5	126.797	119	119	71.5858	2.34375	5
27099339	L	V	275	128.906	121	281	131.719	123	278	130.312	121	121.4	85.9029	2.8125	5
27099339	L	V	291	136.406	119	298	139.688	109	294.5	138.047	116.5	115.5	100.22	3.28125	5
27490	L	V	259	121.406	75	267	125.156	75	263	123.281	76	75.6	114.537	3.75	5
27490	L	A	314	147.188	93	322	150.938	97	318	149.062	97	95.9	114.537	3.75	5
27099530	L	A	258	120.938	135	265	124.219	140	261.5	122.578	138.5	138	100.22	3.28125	5
27099530	L	A	273	127.969	138	278	130.312	132	275.5	129.141	135.5	135.3	71.5858	2.34375	5
27098057	L	V	254	119.062	109	261	122.344	112	257.5	120.703	111.5	111.1	100.22	3.28125	5
27098057	L	A	303	142.031	146	310	145.312	134	306.5	143.672	141	140.6	100.22	3.28125	5
27099412	L	A	270	126.562	136	277	129.844	131	273.5	128.203	137.5	135.9	100.22	3.28125	5
27099412	L	V	296	138.75	100	303	142.031	103	299.5	140.391	103	102.5	100.22	3.28125	5
27100031	L	A	277	129.844	123	286	134.062	130	281.5	131.953	129.5	128.5	128.854	4.21875	5
27096794	L	A	263	123.281	121	272	127.5	128	267.5	125.391	128.5	127.1	128.854	4.21875	5
27096794	L	V	292	136.875	104	301	141.094	107	296.5	138.984	104.5	105	128.854	4.21875	5
27099620	L	A	296	138.75	132	302	141.562	120	299	140.156	127	126.6	85.9029	2.8125	5
27099638	L	A	296	138.75	177	301	141.094	173	298.5	139.922	176	175.7	71.5858	2.34375	5
27099662	L	V	257	120.469	155	263	123.281	155	260	121.875	155	155	85.9029	2.8125	5
27099662	L	A	278	130.312	168	285	133.594	145	281.5	131.953	159	158	100.22	3.28125	5
27096821	L	V	251	117.656	98	261	122.344	101	256	120	100	99.6	143.172	4.6875	5
27096821	L	A	307	143.906	159	312	146.25	165	309.5	145.078	163.5	162.8	71.5858	2.34375	5
27096821	L	V	311	145.781	165	321	150.469	153	316	148.125	162	160.7	143.172	4.6875	5
27095413	L	A	255	119.531	125	259	121.406	128	257	120.469	127	126.6	57.2686	1.875	5
27095413	L	V	299	140.156	113	304	142.5	107	301.5	141.328	110.5	110.3	71.5858	2.34375	5
27093371	L	V	263	123.281	153	273	127.969	132	268	125.625	144	143.5	143.172	4.6875	5
27092999	L	V	301	141.094	127	309	144.844	131	305	142.969	134	132.1	114.537	3.75	5
1627	L	V	273	127.969	110	283	132.656	105	278	130.312	107	107.3	143.172	4.6875	5
1627	L	V	255	119.531	114	263	123.281	118	259	121.406	118	116.9	114.537	3.75	5
1627	L	A	303	142.031	123	311	145.781	127	307	143.906	126	125.8	114.537	3.75	5
27093728	L	V	272	127.5	117	281	131.719	125	276.5	129.609	126.5	124.6	128.854	4.21875	5
27093728	L	A	302	141.562	117	310	145.312	106	306	143.438	112	111.8	114.537	3.75	5
27099470	L	A	279	130.781	132	285	133.594	134	282	132.188	134	133.6	85.9029	2.8125	5
27099470	L	A	293	137.344	128	299	140.156	128	296	138.75	128	128	85.9029	2.8125	5
27099572	L	A	296	138.75	143	303	142.031	148	299.5	140.391	148.5	147.3	100.22	3.28125	5
27099595	L	A	255	119.531	135	261	122.344	149	258	120.938	142	142.1	85.9029	2.8125	5
27099595	L	V	267	125.156	170	272	127.5	184	269.5	126.328	178.5	177.8	71.5858	2.34375	5
27099609	L	V	265	124.219	132	273	127.969	124	269	126.094	131	129.8	114.537	3.75	5
27099609	L	A	282	132.188	115	289	135.469	94	285.5	133.828	105.5	105.1	100.22	3.28125	5
27094378	L	A	282	132.188	156	288	135	157	285	133.594	157	156.7	85.9029	2.8125	5
27099242	L	V	278	130.312	100	286	134.062	97	282	132.188	99	99	114.537	3.75	5
27099242	L	A	301	141.094	89	307	143.906	81	304	142.5	87	85.9	85.9029	2.8125	5
27099232	L	A	286	134.062	142	295	138.281	162	290.5	136.172	154.5	153.5	128.854	4.21875	5
27092512	L	A	306	143.438	120	313	146.719	123	309.5	145.078	123	122.3	100.22	3.28125	5
27098826	L	A	286	134.062	137	292	136.875	130	289	135.469	134	133.6	85.9029	2.8125	5
27099067	L	V	269	126.094	106	276	129.375	99	272.5	127.734	102.5	102.5	100.22	3.28125	5
27099067	L	A	310	145.312	92	316	148.125	85	313	146.719	90	89.3	85.9029	2.8125	5
27099013	L	A	292	136.875	124	301	141.094	129	296.5	138.984	131.5	129.7	128.854	4.21875	5
27099013	L	A	311	145.781	108	315	147.656	105	313	146.719	107	106.6	57.2686	1.875	5
27099147	L	A	271	127.031	116	277	129.844	125	274	128.438	121	121	85.9029	2.8125	5
8688	L	V	262	122.812	118	268	125.625	123	265	124.219	122	121.3	85.9029	2.8125	5
8688	L	A	303	142.031	152	309	144.844	149	306	143.438	153	152	85.9029	2.8125	5
4284	L	A	266	124.688	100	271	127.031	95	268.5	125.859	97.5	97.5	71.5858	2.34375	5
4284	L	A	294	137.812	96	300	140.625	96	297	139.219	96	96	85.9029	2.8125	5
4284	L	V	314	147.188	94	322	150.938	92	318	149.062	94	93.3	114.537	3.75	5
27099670	L	A	285	133.594	137	289	135.469	134	287	134.531	136	135.6	57.2686	1.875	5
27099670	L	V	301	141.094	125	308	144.375	116	304.5	142.734	122	121.5	100.22	3.28125	5
27099064	L	V	264	123.75	133	273	127.969	123	268.5	125.859	128.5	128.4	128.854	4.21875	5
27099064	L	A	284	133.125	127	291	136.406	119	287.5	134.766	124.5	123.8	100.22	3.28125	5
27099167	L	V	272	127.5	153	274	128.438	146	273	127.969	150	149.7	28.6343	0.9375	5
27099167	L	A	285	133.594	119	290	135.938	119	287.5	134.766	119	119	71.5858	2.34375	5
27099167	L	A	316	148.125	90	319	149.531	84	317.5	148.828	88	87.5	42.9515	1.40625	5
27098121	L	V	254	119.062	110	258	120.938	118	256	120	114	114	57.2686	1.875	5
27098121	L	A	272	127.5	140	277	129.844	145	274.5	128.672	143.5	143	71.5858	2.34375	5
27098121	L	A	316	148.125	167	322	150.938	166	319	149.531	167	166.7	85.9029	2.8125	5
27099118	L	V	280	131.25	108	285	133.594	121	282.5	132.422	115.5	115	71.5858	2.34375	5
27099118	L	A	309	144.844	153	314	147.188	155	311.5	146.016	154	154	71.5858	2.34375	5
27094309	L	A	289	135.469	118	296	138.75	115	292.5	137.109	118	117.5	100.22	3.28125	5
27094309	L	V	302	141.562	102	307	143.906	85	304.5	142.734	93.5	93.5	71.5858	2.34375	5
20386	L	A	276	129.375	109	280	131.25	112	278	130.312	111	110.8	57.2686	1.875	5
27099159	L	V	257	120.469	133	263	123.281	131	260	121.875	134	133	85.9029	2.8125	5
27099159	L	A	276	129.375	123	283	132.656	115	279.5	131.016	120	119.8	100.22	3.28125	5
17692	L	A	309	144.844	72	315	147.656	108	312	146.25	88	89	85.9029	2.8125	5
27099231	L	V	267	125.156	164	273	127.969	170	270	126.562	168	167.4	85.9029	2.8125	5
27099231	L	A	295	138.281	194	302	141.562	191	298.5	139.922	193	192.9	100.22	3.28125	5
27099231	L	V	316	148.125	172	322	150.938	157	319	149.531	165	164.6	85.9029	2.8125	5
1924	L	A	274	128.438	134	279	130.781	131	276.5	129.609	133.5	133	71.5858	2.34375	5
27099236	L	V	263	123.281	99	267	125.156	99	265	124.219	99	99	57.2686	1.875	5
27099236	L	A	278	130.312	131	285	133.594	129	281.5	131.953	136	133.3	100.22	3.28125	5
28242	L	V	344	161.25	106	352	165	98	348	163.125	104	103.2	114.537	3.75	6
27093474	L	A	318	149.062	114	325	152.344	109	321.5	150.703	112.5	112	100.22	3.28125	6
2506	L	V	328	153.75	87	334	156.562	78	331	155.156	83	82.7	85.9029	2.8125	6
2506	L	A	370	173.438	55	374	175.312	57	372	174.375	56	55.8	57.2686	1.875	6
2223	L	A	321	150.469	116	324	151.875	118	322.5	151.172	117	117	42.9515	1.40625	6
2223	L	V	337	157.969	105	342	160.312	98	339.5	159.141	102	101.8	71.5858	2.34375	6
2223	L	V	350	164.062	85	354	165.938	78	352	165	82	81.6	57.2686	1.875	6
28280	L	V	325	152.344	101	332	155.625	111	328.5	153.984	111	109	100.22	3.28125	6
27100124	L	V	344	161.25	106	351	164.531	122	347.5	162.891	115.5	115	100.22	3.28125	6
27100124	L	A	359	168.281	125	364	170.625	116	361.5	169.453	121	120.1	71.5858	2.34375	6
27100114	L	A	332	155.625	104	337	157.969	111	334.5	156.797	108	107.7	71.5858	2.34375	6
27100114	L	V	369	172.969	104	376	176.25	90	372.5	174.609	101	99.25	100.22	3.28125	6
18850	L	A	334	156.562	79	337	157.969	78	335.5	157.266	79	78.8	42.9515	1.40625	6
18850	L	V	358	167.812	60	360	168.75	60	359	168.281	60	60	28.6343	0.9375	6
27095195	L	V	317	148.594	113	323	151.406	113	320	150	114	113.4	85.9029	2.8125	6
27095195	L	A	338	158.438	112	343	160.781	113	340.5	159.609	113	112.7	71.5858	2.34375	6
27100206	L	V	346	162.188	109	354	165.938	96	350	164.062	104	103.7	114.537	3.75	6
27100058	L	V	319	149.531	108	328	153.75	124	323.5	151.641	117.5	116.7	128.854	4.21875	6
27095326	L	A	323	151.406	100	328	153.75	104	325.5	152.578	103.5	102.8	71.5858	2.34375	6
24307	L	V	337	157.969	69	344	161.25	79	340.5	159.609	77.2	76.1	100.22	3.28125	6
27100182	L	V	348	163.125	137	354	165.938	130	351	164.531	134	133.9	85.9029	2.8125	6
27097307	L	A	374	175.312	77	378	177.188	73	376	176.25	76	75.2	57.2686	1.875	6
27099178	L	V	337	157.969	100	342	160.312	95	339.5	159.141	99.5	98.7	71.5858	2.34375	6
27092685	L	A	343	160.781	88	347	162.656	94	345	161.719	91	91	57.2686	1.875	6
27092685	L	A	361	169.219	100	365	171.094	95	363	170.156	99	98.4	57.2686	1.875	6
27093432	L	A	323	151.406	107	327	153.281	107	325	152.344	107	107	57.2686	1.875	6
27093432	L	A	379	177.656	94	383	179.531	89	381	178.594	93	92.4	57.2686	1.875	6
27097879	L	A	359	168.281	81	362	169.688	85	360.5	168.984	82.1	82.8	42.9515		6
27097879	L	V	372	174.375	88	376	176.25	85	374	175.312	87	86.6	57.2686	1.875	6
27094531	L	V	338	158.438	76	344	161.25	84	341	159.844	82	81.1	85.9029	2.8125	6
27095572	L	V	325	152.344	78	332	155.625	72	328.5	153.984	76	75.6	100.22	3.28125	6
27095572	L	V	349	163.594	78	356	166.875	78	352.5	165.234	81	79.8	100.22	3.28125	6
27095974	L	A	328	153.75	105	332	155.625	106	330	154.688	106	106	57.2686	1.875	6
23271	L	A	336	157.5	94	340	159.375	88	338	158.438	91	91.2	57.2686	1.875	6
27099967	L	A	326	152.812	79	329	154.219	82	327.5	153.516	80.5	80.5	42.9515	1.40625	6
27099967	L	A	341	159.844	86	343	160.781	85	342	160.312	85	85.3	28.6343	0.9375	6
12627	L	V	339	158.906	73	344	161.25	76	341.5	160.078	74.5	74.3	71.5858	2.34375	6
12627	L	A	376	176.25	67	379	177.656	69	377.5	176.953	68	68	42.9515	1.40625	6
27095453	L	V	349	163.594	87	355	166.406	80	352	165	85.5	84.3	85.9029	2.8125	6
27099906	L	A	326	152.812	69	331	155.156	77	328.5	153.984	74	73.5	71.5858	2.34375	6
27099906	L	A	374	175.312	67	378	177.188	64	376	176.25	66	65.6	57.2686	1.875	6
27099633	L	V	324	151.875	97	331	155.156	95	327.5	153.516	99.5	97.8	100.22	3.28125	6
27099633	L	A	365	171.094	113	372	174.375	119	368.5	172.734	119.5	118.1	100.22	3.28125	6
27092341	L	V	344	161.25	92	348	163.125	84	346	162.188	88	88	57.2686	1.875	6
27098959	L	A	328	153.75	97	334	156.562	101	331	155.156	100	99.6	85.9029	2.8125	6
27098959	L	V	367	172.031	86	372	174.375	84	369.5	173.203	83.5	84.3	71.5858	2.34375	6
27098782	L	A	371	173.906	59	373	174.844	61	372	174.375	60	60	28.6343	0.9375	6
27099717	L	A	342	160.312	112	349	163.594	119	345.5	161.953	116.5	116.1	100.22	3.28125	6
27099717	L	A	380	178.125	80	383	179.531	79	381.5	178.828	79.5	79.5	42.9515	1.40625	6
26972	L	A	278	130.312	129	384	180	129	331	155.156	131	130.3	1517.62	49.6875	6
26972	L	V	323	151.406	99	328	153.75	95	325.5	152.578	97.5	97.3	71.5858	2.34375	6
2523	L	A	331	155.156	86	332	155.625	85	331.5	155.391	85.5	85.5	14.3172	0.46875	6
7632	L	V	333	156.094	115	340	159.375	128	336.5	157.734	127	124.8	100.22	3.28125	6
27095138	L	A	324	151.875	109	328	153.75	102	326	152.812	106	105.6	57.2686	1.875	6
27095138	L	A	374	175.312	91	377	176.719	87	375.5	176.016	88.5	88.8	42.9515	1.40625	6
27099339	L	A	350	164.062	105	354	165.938	109	352	165	109	107.8	57.2686	1.875	6
27099339	L	V	368	172.5	89	373	174.844	82	370.5	173.672	86.5	86	71.5858	2.34375	6
27098057	L	V	340	159.375	84	345	161.719	84	342.5	160.547	84	84	71.5858	2.34375	6
27099412	L	A	329	154.219	94	336	157.5	94	332.5	155.859	99	96.9	100.22	3.28125	6
27100031	L	V	328	153.75	96	333	156.094	95	330.5	154.922	96	95.7	71.5858	2.34375	6
27100031	L	A	354	165.938	106	360	168.75	96	357	167.344	104	102.6	85.9029	2.8125	6
27099573	L	A	334	156.562	80	338	158.438	85	336	157.5	83	82.6	57.2686	1.875	6
27099573	L	V	351	164.531	107	358	167.812	99	354.5	166.172	106	104.8	100.22	3.28125	6
27096794	L	A	335	157.031	93	344	161.25	90	339.5	159.141	93	92.5	128.854	4.21875	6
27096794	L	A	360	168.75	97	365	171.094	99	362.5	169.922	99	98.5	71.5858	2.34375	6
27099620	L	V	337	157.969	109	344	161.25	112	340.5	159.609	111.5	111.1	100.22	3.28125	6
27099620	L	A	359	168.281	104	364	170.625	109	361.5	169.453	107.5	107	71.5858	2.34375	6
27099638	L	A	330	154.688	118	336	157.5	110	333	156.094	114	114.1	85.9029	2.8125	6
27099638	L	A	355	166.406	103	360	168.75	114	357.5	167.578	109	108.7	71.5858	2.34375	6
27099662	L	V	331	155.156	81	337	157.969	89	334	156.562	85	85	85.9029	2.8125	6
27096821	L	A	356	166.875	119	360	168.75	118	358	167.812	118	118.4	57.2686	1.875	6
27095413	L	A	326	152.812	90	330	154.688	96	328	153.75	93	93.2	57.2686	1.875	6
27093371	L	A	328	153.75	56	333	156.094	55	330.5	154.922	57	56.3	71.5858	2.34375	6
27093728	L	A	371	173.906	68	376	176.25	71	373.5	175.078	70.5	70	71.5858	2.34375	6
27099572	L	A	348	163.125	93	352	165	91	350	164.062	92	92.2	57.2686	1.875	6
27099595	L	A	323	151.406	86	325	152.344	85	324	151.875	86	85.7	28.6343	0.9375	6
27885	L	V	322	150.938	101	328	153.75	102	325	152.344	102	101.7	85.9029	2.8125	6
27885	L	A	347	162.656	97	353	165.469	99	350	164.062	98	97.9	85.9029	2.8125	6
27099609	L	A	341	159.844	93	345	161.719	97	343	160.781	96	95.4	57.2686	1.875	6
27094378	L	V	341	159.844	94	348	163.125	92	344.5	161.484	95	94.3	100.22	3.28125	6
27099242	L	V	357	167.344	56	360	168.75	57	358.5	168.047	57	56.8	42.9515	1.40625	6
27099242	L	A	369	172.969	50	372	174.375	50	370.5	173.672	50	50	42.9515	1.40625	6
27092512	L	V	319	149.531	124	326	152.812	117	322.5	151.172	123	122.1	100.22	3.28125	6
27098826	L	A	322	150.938	95	328	153.75	100	325	152.344	99	98.3	85.9029	2.8125	6
27099147	L	A	320	150	120	327	153.281	134	323.5	151.641	129	128.1	100.22	3.28125	6
27099147	L	V	327	153.281	134	331	155.156	133	329	154.219	134	133.8	57.2686	1.875	6
8688	L	A	350	164.062	94	355	166.406	98	352.5	165.234	96.5	96.3	71.5858	2.34375	6
8688	L	V	372	174.375	96	379	177.656	91	375.5	176.016	94.5	94.1	100.22	3.28125	6
4284	L	A	333	156.094	74	338	158.438	66	335.5	157.266	69	69.5	71.5858	2.34375	6
27099670	L	A	331	155.156	95	337	157.969	97	334	156.562	97	96.3	85.9029	2.8125	6
27099064	L	A	329	154.219	91	337	157.969	94	333	156.094	93	92.7	114.537	3.75	6
27099064	L	V	346	162.188	90	351	164.531	77	348.5	163.359	84	83.8	71.5858	2.34375	6
27098121	L	V	325	152.344	163	332	155.625	156	328.5	153.984	159.5	159.5	100.22	3.28125	6
27099118	L	V	338	158.438	137	343	160.781	128	340.5	159.609	134	133.3	71.5858	2.34375	6
27094309	L	V	329	154.219	83	333	156.094	78	331	155.156	81	80.6	57.2686	1.875	6
27094309	L	A	367	172.031	96	373	174.844	105	370	173.438	103	101.9	85.9029	2.8125	6
20386	L	A	327	153.281	122	335	157.031	101	331	155.156	111	111.3	114.537	3.75	6
27099159	L	V	320	150	80	326	152.812	75	323	151.406	80	78.7	85.9029	2.8125	6
27099159	L	A	356	166.875	66	362	169.688	74	359	168.281	70	70.3	85.9029	2.8125	6
27092360	L	A	328	153.75	157	334	156.562	154	331	155.156	157	156.1	85.9029	2.8125	6
27092360	L	V	353	165.469	162	359	168.281	163	356	166.875	164	163.6	85.9029	2.8125	6
27092360	L	A	375	175.781	148	378	177.188	142	376.5	176.484	145.5	145.3	42.9515	1.40625	6
17692	L	V	317	148.594	118	327	153.281	74	322	150.938	115	107.2	143.172	4.6875	6
17692	L	A	361	169.219	16	365	171.094	15	363	170.156	17	16.4	57.2686	1.875	6
27099231	L	A	368	172.5	74	372	174.375	67	370	173.438	70	70.2	57.2686	1.875	6
1924	L	A	332	155.625	96	336	157.5	92	334	156.562	94	94	57.2686	1.875	6
27099236	L	V	327	153.281	107	331	155.156	105	329	154.219	107	106.4	57.2686	1.875	6
27095326	L	A	383	179.531	85	388	181.875	84	385.5	180.703	86	85.2	71.5858	2.34375	7
27093905	L	V	405	189.844	105	413	193.594	104	409	191.719	108	106.3	114.537	3.75	7
26972	L	A	402	188.438	63	407	190.781	59	404.5	189.609	61.5	61.2	71.5858	2.34375	7
27099362	L	A	399	187.031	89	404	189.375	97	401.5	188.203	95	94.2	71.5858	2.34375	7
27099412	L	V	397	186.094	66	403	188.906	74	400	187.5	76	73.1	85.9029	2.8125	7
27099620	L	V	415	194.531	76	421	197.344	75	418	195.938	78	76.7	85.9029	2.8125	7
27093371	L	V	395	185.156	53	401	187.969	52	398	186.562	55	53.7	85.9029	2.8125	7
27092999	L	A	384	180	66	389	182.344	66	386.5	181.172	67	66.5	71.5858	2.34375	7
27099609	L	A	385	180.469	77	388	181.875	76	386.5	181.172	77.5	77	42.9515	1.40625	7
27092512	L	V	391	183.281	89	398	186.562	82	394.5	184.922	89	87.5	100.22	3.28125	7
27099670	L	A	391	183.281	78	396	185.625	77	393.5	184.453	78	77.7	71.5858	2.34375	7
27098121	L	A	394	184.688	82	399	187.031	77	396.5	185.859	90	79.8	71.5858	2.34375	7
20386	L	A	385	180.469	62	389	182.344	62	387	181.406	62	62.2	57.2686	1.875	7
27099236	L	A	387	181.406	60	391	183.281	62	389	182.344	61	60.8	57.2686	1.875	7
